## TITLE

### **Within-species floral odor variation is maintained by spatial and temporal heterogeneity in pollinator communities**

## AUTHOR LIST

Mark A. Szenteczki<sup>1+\*</sup>, Adrienne L. Godschalx<sup>1+</sup>, Andrea Galmán<sup>2</sup>, Anahí Espíndola<sup>3</sup>, Marc Gibernau<sup>4^</sup>, Nadir Alvarez<sup>5,6^</sup>, Sergio Rasmann<sup>1^+</sup>

<sup>1</sup> Université de Neuchâtel, Institut de Biologie, Rue Emile-Argand 11, 2000 Neuchâtel, Switzerland

<sup>2</sup> Misión Biológica de Galicia (MBG-CSIC), Pontevedra, Galicia, Spain

<sup>3</sup> Department of Entomology, University of Maryland, College Park, Maryland

<sup>4</sup> CNRS – University of Corsica, Laboratory Sciences for the Environment (SPE - UMR 6134), Natural Resources Project, Vignola – Route des Sanguinaires, 20000 Ajaccio, France

<sup>5</sup> Geneva Natural History Museum, Route de Malagnou 1, 1208 Genève, Switzerland

<sup>6</sup> Department of Genetics and Evolution, University of Geneva, Quai Ernest-Ansermet 30, 1211 Geneva, Switzerland

<sup>+</sup> Authors participated equally and are considered joint first authors

<sup>^</sup> Authors participated equally and are considered joint senior authors

\* Corresponding author: M.A. Szenteczki, Tel. + 41 32 718 23 16

**RUNNING TITLE** – Pollinator shifts maintain floral odor var.

**ABSTRACT LENGTH** – 143 words

**MAIN TEXT LENGTH** – 4700 words

**NUMBER OF REFERENCES** – 95

**NUMBER OF FIGURES** – 3

**NUMBER OF TABLES** – 1

**KEYWORDS** Balancing selection, deceptive pollination, gas-chromatography-mass-spectrometry, genomic storage effect, local adaptation, reciprocal transplant, temporal variation

## AUTHOR CONTRIBUTIONS

NA, SR, MG designed research. MAS, ALG, AG, AE performed research. MAS, ALG, MG analyzed data. MG contributed new reagents or analytical tools. MAS and ALG wrote the manuscript, and all authors contributed substantially to revisions and gave final approval for publication.

## DATA ACCESSIBILITY STATEMENT

The datasets generated during and/or analysed in this study are not yet publicly available, due to the pending submission of this preprint at a peer-reviewed scientific journal. However, they are available from the corresponding author on reasonable request.

1 **ABSTRACT**

2 Floral odor is a complex trait that mediates many biotic interactions, including pollination.  
3 While high intraspecific floral odor variation appears to be common, the ecological and  
4 evolutionary drivers of this variation are often unclear. Here, we investigated the influence of  
5 spatially and temporally heterogeneous pollinator communities on floral odor variation in  
6 *Arum maculatum* (Araceae). Through Europe-wide field surveys, we identified high floral odor  
7 diversity and shifts in the dominant pollinator species within several *A. maculatum* populations  
8 compared to pollinator data from the same sites ten years ago. Using common-garden  
9 experiments, we further confirmed that inflorescences from native and foreign pollinator  
10 backgrounds were equally efficient at attracting local pollinators. The substantial within-  
11 population floral odor variation we observed may therefore be advantageous when facing  
12 temporally heterogeneous pollinator communities. We propose spatio-temporal heterogeneity  
13 in pollinators as one potential mechanism maintaining diverse floral odor bouquets in  
14 angiosperms.

## 15 INTRODUCTION

16 The rapid diversification of angiosperms relative to other land plants has long fascinated  
17 evolutionary biologists, dating back to Darwin (1903). Today, we can attribute much of the  
18 variation in angiosperm diversification rates to plant-pollinator interactions (Hernández-  
19 Hernández and Wiens 2020). As the dominant pollinators across all terrestrial ecosystems,  
20 insects play a key role in floral trait evolution (Sprengel 1793, Henslow 1888; Grant 1949;  
21 Raven 1977; Kevan and Baker 1983; Crepet and Niklas 2009; van der Niet and Johnson 2012;  
22 Schiestl and Johnson 2013). These plant-insect interactions are mediated by multimodal floral  
23 signals (reviewed in Junker and Parachnowitsch 2015), which include odor (Holopainen 2004;  
24 Raguso 2008ab; Whitehead and Peakall 2009), color (Goyret et al. 2007; du Plessis et al. 2018),  
25 morphology (Ayasse et al. 2003; Ibanez et al. 2010), nectar (Parachnowitsch et al. 2019), and  
26 pollen (Dobson and Bergström 2000). Nowadays, we are able to identify many plant volatile  
27 organic compounds (VOCs) with relative ease (Knudsen and Gershenzon 2020). However, the  
28 ecological and evolutionary drivers of floral odor variation often remain unclear, due to  
29 difficulties in collecting and integrating data on floral odor variation and spatio-temporal  
30 variation in pollinators.

31

32 In a recent review, Delle-Vedove et al. (2017) found that intraspecific floral odor variation is  
33 frequently identified within diverse angiosperm lineages. Since heterogenous pollinator  
34 communities are known to influence variation in many plant traits (Schemske and Horvitz  
35 1988; Fishbein and Venable 1996; Price et al. 2005; Weber et al. 2019), it can be argued that  
36 floral odor variation should also be influenced by spatio-temporal variation in pollinators  
37 (Delle-Vedove et al. 2017, Haveramp et al. 2018, Dormont et al. 2019, Friberg et al. 2019,  
38 Burkle et al. 2020, Farré-Armengol et al. 2020). However, only a small fraction of studies to  
39 date have been able to explicitly link floral odor variation and variation in pollinator

40 community structure (e.g. Chess et al. 2008; Klahre et al. 2011; Breitkopf et al. 2013; Peter  
41 and Johnson 2014; Sun et al. 2013; Gross et al. 2016). Several factors may explain this  
42 discrepancy, including phylogenetic constraints in the biosynthetic pathways for the production  
43 of VOCs (Raguso et al. 2006), tradeoffs between pollinator attraction and chemical defense  
44 against herbivory (Schiestl et al. 2014), biochemical and energetic limitations (Delle-Vedove  
45 et al. 2011), genetic drift (Suinyuy et al. 2012), or gene flow (Svensson et al. 2005). Moreover,  
46 most of the aforementioned surveys of floral odor and pollinator community variation were  
47 carried out at a single timepoint. As a result, the impact of temporal heterogeneity in pollinator  
48 communities on floral odor variation remains unknown; here, we aim to address this gap in our  
49 knowledge.

50

51 If pollinator communities vary temporally within populations, heterogeneous and/or  
52 frequency-dependent selective pressures may favor the maintenance of floral odor variation  
53 through balancing selection (Delph and Kelly 2013; Wittmann et al. 2017; Bertram and Masel  
54 2019). Alternatively, if pollinators only vary spatially among populations, we might expect  
55 divergent selective pressures to occur, leading to local adaptation (Leimu and Fischer 2008,  
56 Gómez et al. 2009; Gross et al. 2016; Gervasi and Schiestl 2017; Suinyuy and Johnson 2018;  
57 Sayers et al. 2020). Variation may also result from phenotypic plasticity under variable abiotic  
58 conditions or biotic interactions (Majetic et al. 2009; Campbell et al. 2019), if several floral  
59 odor phenotypes can result from a single genotype. Here, we investigated how each of these  
60 three processes influence floral odor variation, using wild populations of *Arum maculatum*  
61 (Araceae).

62

63 Several aspects of *A. maculatum*'s ecology make it a suitable model system for studying the  
64 relationship between pollinators and floral odor. *Arum maculatum* inflorescences attract and

65 temporarily trap their pollinators, mainly the moth flies *Psychoda phalaenoides* and *Psychoda*  
66 *griseus* (Diptera: Psychodidae), using complex blends of VOCs which appear to vary across  
67 the species distribution range (Kite 1995; Kite et al. 1998; Diaz and Kite 2002; Chartier et al.  
68 2011; Chartier et al. 2013). These odor blends are thought to mimic the odor of dung or rotting  
69 organic matter, the natural brood sites of these Psychodidae (Lack and Diaz 1991). Pollinators  
70 are trapped in a highly specialized floral chamber (Bröderbauer et al. 2013) until the day after  
71 VOC emissions (Gibernau et al. 2004). As a result, we are able to accurately quantify the  
72 complete pollinator community attracted by each inflorescence, and unambiguously relate  
73 pollinator abundances to VOC emissions. Since *A. maculatum* inflorescences do not offer any  
74 rewards to their pollinators (Lack and Diaz 1991), and Psychodidae appear to be attracted by  
75 VOCs alone (Dormer 1960; Kite 1995; Urru et al. 2011), the reproductive success of an  
76 individual inflorescence (i.e. its ability to attract efficient pollinators) should be closely tied to  
77 its unique floral odor. Selfing is also avoided through protogyny; female flowers are no longer  
78 receptive to pollen when the male flowers mature (Lack and Diaz 1991).

79

80 This unique pollination ecology provides an opportunity to address key questions on how and  
81 why floral odor variation is maintained in widely distributed species. Namely, is variation  
82 maintained across species ranges, due to spatial variation in pollinators, or within populations,  
83 due to temporally heterogeneous pollinators? Spatial and temporal variation in pollinators may  
84 drive floral odor variation through one or more of the aforementioned evolutionary processes  
85 (i.e. balancing selection, local adaptation, or plasticity). Below, we summarize the patterns in  
86 floral odor diversity we expected to observe under each scenario:

87

88 1) Balancing selection is expected to maintain greater variation in deceptively pollinated  
89 species compared to rewarding species (Ackerman et al. 2011), through temporal variation in

90 pollinator communities (Schemske and Horvitz 1989), frequency-dependent selection driven  
91 by pollinator learning (Ayasse et al. 2000), or relaxed selection (Salzmann et al. 2007). The  
92 tetraploid genome of *A. maculatum* (Turco et al. 2014) may allow balancing selection to  
93 maintain variation within individual genomes as well (Mable et al. 2018). If *A. maculatum*  
94 floral odor is a balanced polymorphic trait, we would expect to observe high variation in floral  
95 odor both within and among populations. This variation may be a consequence of either: a)  
96 temporally heterogeneous pollinator communities within populations, whose varying  
97 preferences maintain floral odor diversity, or b) pollinator learning, if pollinator communities  
98 are stable within populations through time.

99

100 2) Populations of *A. maculatum* are known to predominantly attract either *P. phalaenoides* or  
101 *P. griseus* in different regions across their distribution (Espindola et al. 2010). Following  
102 the ‘local vs. foreign’ definition of local adaptation (Kawecki and Ebert 2004) we might  
103 alternatively predict that *A. maculatum* populations harbor distinct floral odor variations, which  
104 maximize the attraction of their dominant local pollinator species. If these variations are true  
105 local adaptations, we would expect to observe decreased pollinator attraction efficiency when  
106 *A. maculatum* inflorescences are transplanted to non-native pollinator backgrounds.

107

108 3) As organisms rooted in place, plants benefit from adaptive plasticity in response to variable  
109 environmental conditions or biotic interactions (Majetic et al. 2009; Metlen et al. 2009). If *A.*  
110 *maculatum* floral odor is a plastic trait, we would expect to observe a correlation between  
111 climatic variables and floral odor variation across the wide geographic range of *A. maculatum*,  
112 and/or a shift in VOC emissions when inflorescences are transplanted to non-native  
113 environments.

114

115 Here, we tested these three sets of predictions by surveying natural variation in *A. maculatum*  
116 floral odor and pollinator attraction across Europe, and by transplanting individuals from all  
117 sampled populations to two common garden sites dominated by different pollinator species  
118 (either *Psychoda phalaenoides* or *Psycha grisescens*). Importantly, we selected sampling sites  
119 with pollinator data collected approximately ten years ago by Espíndola et al. (2010), allowing  
120 us to investigate temporal heterogeneity in pollinator communities within our study. Together,  
121 these data allowed us to understand the extent of within- and between-population variation in  
122 *A. maculatum* floral scent, how this variation is organized across a wide geographic range, and  
123 how both spatial and temporal pollinator community dynamics influence floral odor variation.

124

## 125 **MATERIALS AND METHODS**

### 126 Field sampling sites

127 We sampled eleven populations of *A. maculatum*, including three in France (Forêt du Gâvre,  
128 Conteville, and Chaumont), two in Switzerland (Neuchâtel and Cortaillod), two in Italy  
129 (Montese and Rifreddo), one in Croatia (Visuč), two in Serbia (Gostilje and Sokobanja), and  
130 one in Bulgaria (Chiflik), as shown in Appendix S1, Figure S1. Full sampling information,  
131 including location data and sample sizes are given in Appendix S1, Table S1. We selected Forêt  
132 du Gâvre and Neuchâtel, which are respectively dominated by *Psycha grisescens* and *Psychoda*  
133 *phalaenoides*, as our two common garden sites. Five to ten *A. maculatum* individuals from each  
134 population were potted and transplanted to both sites; inflorescences from Forêt du Gâvre and  
135 Neuchâtel were also reciprocally transplanted as part of this experiment.

136

### 137 Floral odor and pollinator sampling

138 During the typical flowering period of *A. maculatum* (April – May), we conducted: 1) field  
139 sampling between 2017 and 2019, and 2) common garden experiments in Neuchâtel in 2018

140 and 2019, and in Forêt du Gâvre in 2019. In both field surveys and common garden  
141 experiments, we collected dynamic headspace VOCs and identified pollinators using identical  
142 methods, as detailed in Appendix S2: Supplementary Methods. Briefly, we collected VOCs  
143 from *A. maculatum* inflorescences undergoing anthesis in the early evening on  
144 polydimethylsiloxane (PDMS) coated Twister® stir bars (Gerstel: Mülheim an der Ruhr,  
145 Germany), at a rate of 200 mL min<sup>-1</sup> for 30 minutes. Twisters® were kept on ice in sealed glass  
146 containers until gas chromatography–mass spectrometry (GC-MS) analysis, where volatiles  
147 were thermally desorbed and separated on a HP-5MS column. During the morning following  
148 VOC sampling, we collected all insects trapped within inflorescences and preserved them in  
149 70% ethanol until identification.

150

#### 151 Testing for balancing selection and temporal heterogeneity in pollinators

152 First, we investigated Europe-wide patterns in floral odor variation, by calculating Bray-Curtis  
153 similarities between all individuals in our *in situ* field surveys, and visualizing the result using  
154 nonmetric multidimensional scaling (NMDS). We then assessed the effect of population (fixed  
155 effect factor) on the entire VOCs matrix using permutational multivariate analysis of variance  
156 (PERMANOVA, Bray-Curtis distance, n = 999 permutations) with the *adonis* function in the  
157 R v.3.6.1 (R Core Team 2019) package *vegan* (Oksanen et al. 2019). Then, we compared the  
158 extent of both within- and between-population variation in floral odor using Bray-Curtis  
159 similarity matrices, visualizing the resulting similarity scores using boxplots.

160

161 Second, we investigated shifts in the dominant pollinators trapped by *A. maculatum* over the  
162 past decade, both in terms of 1) Psychodidae species and 2) other insect families, comparing  
163 our observations with data (mean abundances) from the same sites in Espíndola et al. (2010).  
164 We began by calculating the mean quantities of each pollinator species trapped per



165 inflorescence within each population. Then, to investigate shifts in pollinators, we calculated  
166 Bray-Curtis distances between pollinator communities now (2017-2019) and approximately a  
167 decade ago (2006-2008) for all sites with data from both timepoints, and visualized these  
168 results using NMDS ordinations.

169

#### 170 Testing for local adaptation to pollinators using common garden experiments

171 First, we visualized geographic patterns in mean pollinator attraction for each population *in*  
172 *situ*, and following transplants to both common garden sites. Then, following the ‘local vs.  
173 foreign’ definition of local adaptation (Kawecki and Ebert 2004), we tested the hypotheses  
174 that: in the Neuchâtel common garden, transplanted *A. maculatum* inflorescences which attract  
175 *P. phalaenoides* in their native population should catch 1) more *P. phalaenoides* and/or 2) more  
176 insects in total than inflorescences which attract *P. grisescens* in their native population. We  
177 expected the opposite pattern in the Forêt du Gâvre common garden (i.e. transplanted  
178 inflorescences that attract *P. grisescens* in their native population should perform better on  
179 average in Forêt du Gâvre). These predictions were tested using a two-way ANOVA on log+1  
180 transformed pollinator counts, including ‘native pollinator’ (i.e. *P. phalaenoides*- or *P.*  
181 *grisescens*-dominated) and ‘common garden location’ (i.e. whether the common garden site  
182 was dominated by *P. phalaenoides* or *P. grisescens*) and their interaction as fixed factors. Here,  
183 a significant interaction would suggest local adaptation to native pollinator communities.  
184 Finally, we plotted ‘deme × habitat’ interactions (per Kawecki and Ebert 2004)—deme and  
185 habitat referring respectively to a local population and its local environmental conditions (here  
186 the pollinator community)—for mean attraction rates of *P. phalaenoides*, *P. grisescens*, and all  
187 insects. Data for these plots were subset based on each inflorescence’s native pollinator and  
188 common garden location, as described above.

189

190 Testing for phenotypic plasticity and climatic correlates of floral odor variation

191 To address the correlation between climatic variation across Europe, floral odor, and pollinator  
192 communities trapped within inflorescences, we used two complementary approaches. First, we  
193 clustered individuals based on similarities in their proportional VOC emissions using  
194 unsupervised learning algorithms (as detailed in Appendix S2: Supplementary Methods) to test  
195 for VOC bouquet convergence due to spatial segregation or local adaptation to pollinators  
196 (Andersson et al. 2002; Hetherington-Rauth and Ramírez 2016). We then investigated whether  
197 the resulting floral odor clusters were differentially attractive to pollinator groups, including  
198 Psychodidae (identified to the species level), Brachycera, Nematocera, and Staphylinidae. To  
199 control for potential biases caused by differences in the dominant pollinator species among all  
200 sampled populations, we split these comparisons based on whether individuals were sampled  
201 in a site typically dominated by *P. phalaenoides* or *P. grisescens*. We used Kruskal-Wallis tests  
202 to determine whether clusters attracted different pollinator species in each pollinator  
203 background.

204 Next, we investigated the influence of large-scale climatic variation on floral odor variation,  
205 by performing a mantel test (Euclidean distance, 999 replicates) between 19 bioclimatic layers  
206 (BIO1-BIO19) at 30-seconds resolution from WorldClim (Hijmans et al. 2005) and population-  
207 level VOC data from our field surveys. Then, we investigated whether the types or proportions  
208 of odor variations within populations shifted as result of transplanting by comparing the  
209 relative abundances of each VOC cluster, both within populations of origin and following  
210 transplants.

211

212 Finally, we investigated whether specific VOCs were associated with the attraction of *P.*  
213 *phalaenoides* or *P. grisescens*. We identified candidate compounds using the Random Forest  
214 implementation in the R package *randomForest* (Liaw and Wiener 2002), with permutation

215 importance enabled ( $n_{tree} = 500$ ,  $m_{try} = 8$ ; optimized using the *tuneRF* function). Then, we  
216 calculated conditional feature contributions, and identified the combinations of compounds  
217 which had the greatest influence on the predictive strength of the model above, using the  
218 Python package *TreeInterpreter* (Saabas 2019). Finally, we performed Mann-Whitney *U*-tests  
219 to identify shifts in the candidate compounds most strongly associated with *P. phalaenoides* or  
220 *P. griseascens* attraction. Specifically, we tested whether populations with sufficiently large  
221 sample sizes ( $n \geq 8$ ) emitted different quantities of candidate compounds, when comparing  
222 between the two common gardens.

223

## 224 **RESULTS**

### 225 Balancing selection and temporal heterogeneity in pollinators

226 We observed that *A. maculatum* floral odor is highly variable across Europe. After filtering out  
227 compounds present in blank samples, we retained 18 *A. maculatum* floral VOCs present in  
228 relative abundances above 1% (Table 1). Many of the major compounds we identified (e.g.  
229 indole, p-cresol, 2-heptanone,  $\beta$ -citronellene, and three unnamed sesquiterpenes) have been  
230 previously reported in studies of *A. maculatum* floral odor (Diaz and Kite 2002; Chartier et al.  
231 2013; Marotz-Clausen et al. 2018). Populations across Europe differed in their proportional  
232 emissions of VOCs *in situ* (PERMANOVA,  $R^2 = 0.38$ ,  $\text{Pr}( > F ) = 0.001$ ). However, we observed  
233 substantial within- and among-population variation in floral odor (Appendix S1, Figure S2),  
234 resulting in no clear regional differentiation in the NMDS ordination (Appendix S1, Figure  
235 S3).

236

237 We also observed that *A. maculatum* pollinator communities are temporally variable.  
238 Ultimately, we were able to re-survey pollinators trapped by *A. maculatum* inflorescences in  
239 six populations (listed in Figure 1), approximately 10 years after the surveys conducted by

240 Espíndola et al. (2010). The total insect communities trapped by *A. maculatum* appear to have  
241 shifted in most of these populations - only Forêt du Gâvre remained relatively consistent over  
242 the past decade (Figure 1). When focusing on Psychodidae only, we observed shifts in the  
243 dominant psychodid pollinator trapped within inflorescences in four out of six populations:  
244 Chaumont FR, Conteville FR, Gostilje SRB, and Visuć, HR (Figure 1). Additionally, we  
245 identified a substantial decrease in the average quantity of pollinators trapped within  
246 inflorescences in Conteville FR: from 47.6 *P. phalaenoides* and 2.3 *P. grisescens* per  
247 inflorescence in Espíndola et al. (2010), to 0.4 *P. phalaenoides* and 1.3 *P. grisescens* in our  
248 sampling (full results in Appendix S1, Table S2).

249

#### 250 Local adaptation to pollinators

251 We observed that transplanted inflorescences typically attracted the dominant local pollinator  
252 species as efficiently as native inflorescences in both common gardens (Figure 2). While  
253 common garden location had a significant effect on the quantity of *P. phalaenoides* and *P.*  
254 *grisescens* caught by *A. maculatum* (i.e. the two transplant sites were indeed dominated by  
255 different Psychodidae species), no native pollinator × common garden location interaction  
256 effect was observed (2-way ANOVA,  $\text{Pr}( > F ) > 0.05$ ; full results in Appendix S1, Table S3).  
257 Together, these results show that *A. maculatum* populations are generally not locally adapted  
258 to a single pollinator species (Figure 3), with some possible exceptions in Forêt du Gâvre, and  
259 the two Serbian populations Gostilje and Sokobanja, which will be discussed below.

260

261 While populations generally may not be locally adapted to specific pollinators, not all floral  
262 odor blends were equally attractive to all pollinator species. Notably, one population (Forêt du  
263 Gâvre) continued to exclusively attract their native pollinator *P. grisescens* when transplanted  
264 to the Neuchâtel common garden, despite *P. phalaenoides* being the most abundant species in

265 Neuchâtel when these transplanted inflorescences opened (see Appendix S1, Figure S4).  
266 Additionally, transplanted inflorescences occasionally attracted ‘non-dominant’ Psychodidae  
267 species in both common garden sites, and a third pollinator species (*Psychoda trinodulosa*) was  
268 also identified within inflorescences in Croatia and Serbia during our field surveys (Figure 2).  
269 This species was also observed in the Neuchâtel common garden, but not in Forêt du Gâvre.  
270 Inflorescences from both Serbian populations (Gostilje and Sokobanja) continued to  
271 occasionally attract *P. trinodulosa* when transplanted the Neuchâtel common garden.

272

### 273 Phenotypic plasticity and climatic correlates of floral odor variation

274 The cluster validation process identified two groups, clustered using the PAM (Partitioning  
275 Around Medoids) algorithm, to be optimal for our VOC dataset (Appendix S1, Figures S5 and  
276 S6). Cluster 1 was characterized by high mono- and sesquiterpene emissions, while Cluster 2  
277 was characterized by high indole emissions. Five compounds (indole, skatole, Z-  
278 caryophyllene,  $\beta$ -caryophyllene, and unnamed sesquiterpene RI 1473) varied significantly  
279 between PAM clusters (Kruskal-Wallis test,  $p < 0.05$ ,  $df = 2$ ). The aforementioned unnamed  
280 sesquiterpene (Kovats index apolar 1473) has been previously identified in the floral scent of  
281 *Arum italicum* (M. Gibernau, unpublished data). The average VOC blends of both PAM  
282 clusters are summarized in Table 1, and visualized in Appendix S1, Figure S7. Both clusters  
283 were widely distributed across Europe; indole-dominated Cluster 2 was not observed in  
284 Rifreddo or Visuć, though smaller sample sizes in these populations may have contributed to  
285 this result (Appendix S1, Figure S8). Ultimately, whether an inflorescence belonged to Cluster  
286 1 or 2 did not appear to strongly influence pollinator attraction, with considerable variation  
287 observed within both Clusters (Appendix S1, Figure S9). We did not identify any significant  
288 differences between Clusters 1 and 2, in terms of species-specific Psychodidae attraction

289 (Kruskal-Wallis tests,  $p > 0.05$ ,  $df = 2$ ), after controlling for the dominant pollinator species  
290 where each sample was collected.

291

292 Random Forest analyses identified one compound positively correlated with *P. phalaenoides*  
293 attraction ( $\beta$ -humulene), and three compounds positively correlated with *P. grisescens*  
294 attraction (unnamed sesquiterpenes RI 1473 and 1681, and  $\alpha$ -selinene). After evaluating  
295 combined feature contributions within the above Random Forest model (Appendix S1, Figure  
296 S10), we found that the predictive strength of the model was most strongly influenced by  
297 unnamed sesquiterpene (RI 1681) alone. Other strong combinations included unnamed  
298 sesquiterpene RI 1681 paired with unnamed sesquiterpene RI 1473 or  $\alpha$ -selinene, as well as  $\beta$ -  
299 humulene alone, mirroring the results in our initial variable importance plot (full  
300 *Treeinterpreter* results in Appendix S1, Table S4).

301

302 We observed that inter-population variation in VOC blends overall did not correlate with  
303 bioclimatic variables (Mantel test,  $p = 0.823$ ). Average sesquiterpene emissions remained  
304 relatively consistent between *in situ* samples and following transplants to Neuchâtel, but  
305 appeared to increase after inflorescences were transplanted to Forêt du Gâvre (Appendix S1,  
306 Figure S11). Among the four compounds linked to species-specific Psychodidae attraction,  
307 we only observed significant shifts between reciprocally transplanted inflorescences from  
308 Neuchatel and Forêt du Gâvre (Mann-Whitney tests, full result in Appendix S1, Table S5). For  
309 the two other populations with sufficiently large sample sizes (Montese, IT and Chaumont,  
310 FR), we did not observe significant differences in the emissions of these four compounds when  
311 comparing between the two common garden sites (Appendix S1, Table S5) . Together, these  
312 results suggest that plasticity may contribute to the floral odor variation we observed (e.g. in  
313 the case of transplanted inflorescences from Neuchatel), but in general, the effect of

314 transplanting on inflorescences appears to be relatively minor in comparison to natural  
315 intrapopulation variation in floral odor.

316

## 317 **DISCUSSION**

318 In this study, we performed a range-wide survey of *Arum maculatum* floral odor and pollinator  
319 attraction, which identified substantial within-population variation in floral odor (Appendix  
320 S1, Figures S2 and S3), and shifts in pollinator community composition in several populations  
321 over the past decade (Figure 1). Through common garden experiments, we further  
322 demonstrated that *A. maculatum* populations typically are not locally adapted to attract  
323 exclusively *Psychoda phalaenoides* or *Psycha grisescens* (Figures 2 and 3), though local  
324 adaptation might have contributed to pollinator attraction patterns in one French and two  
325 Serbian populations. Excepting host-pathogen case studies (reviewed in Delph and Kelly  
326 2013), our study is among the first to demonstrate that temporally fluctuating selective  
327 pressures may act to maintain high variation in a key plant trait.

328

329 Balancing selection may maintain variation within populations through several selective  
330 regimes, including relaxed selection, negative frequency-dependent selection due to pollinator  
331 learning, or environmental heterogeneity (Delph and Kelly 2013). While relaxed selection on  
332 floral odor has been observed in some angiosperms (Salzmann et al. 2007; Ibanez et al. 2010),  
333 this is unlikely the case for *A. maculatum*, given that pollinator attraction is driven by floral  
334 odor alone (Dormer 1960; Lack and Diaz 1991). Furthermore, while pollinator learning has  
335 been shown to maintain polymorphism in floral color (Gigord et al. 2001) and odor (Ayasse et  
336 al. 2000), we would argue that this is less likely to occur in the case of *A. maculatum*. Since  
337 several Psychodidae species are trapped at rates that appear to vary over short time scales, the  
338 resulting selective pressure on pollinators is likely too inconsistent to lead to adaptive pollinator

339 learning (Renner 2006). This leaves variable conditions (i.e. pollinator communities) as the  
340 mechanism most likely contributing to the maintenance of diverse floral odor bouquets in *A.*  
341 *maculatum*. Further research on temporal variation in pollinators may provide greater clarity  
342 in other cases where floral trait variation cannot be explained by pollinator learning (e.g.  
343 Pellegrino et al. 2005; Jersáková et al. 2006). Our results may also explain why evidence for  
344 greater floral odor diversity in deceptive species compared to rewarding species is weak  
345 (Ackerman et al. 2011) or largely absent (Delle-Vedove et al. 2017).

346

347 Building on reciprocal transplants between two *A. maculatum* populations conducted by  
348 Chartier et al. (2013), we found that local adaptation is counteracted by temporally  
349 heterogeneous pollinator communities across Europe, with one possible exception. The Forêt  
350 du Gâvre population in France appears to have lost the ability to attract *P. phalaenoides*, either  
351 due to local adaptation resulting from the large, stable populations of *P. grisescens* we observed  
352 in their native habitat (Figure 1) or genetic drift, which is known to occur at the limits of species  
353 ranges (Geber 2011; Gould et al. 2013). Similarly, the fact that the two Serbian populations  
354 continued to attract a third psychodid species (*P. trinodulosa*) in the Neuchâtel common  
355 garden, while inflorescences from other regions did not, also argues for some level of local  
356 adaptation (Figure 2). These patterns suggest that specific compounds may also be  
357 differentially attractive to *P. trinodulosa*, but this species was too infrequently observed in our  
358 study to make any firm conclusions. These results thus do not exclude the possibility that  
359 individual VOCs are differentially attractive to certain Psychodidae species, which might be  
360 expected given previously reported differences in antennal sensilla (Faucheux and Gibernau  
361 2011).

362



363 Through Random-Forest analyses, we identified four VOCs correlated with the attraction of *P.*  
364 *phalaenoides* ( $\beta$ -humulene) and *P. grisescens* (unidentified sesquiterpenes RI 1473 and 1681,  
365 and  $\alpha$ -selinene). Indole, another abundant VOC in the *A. maculatum* odor bouquet, appears to  
366 be generally attractive to females of both species (Appendix S1, Figure S9 and S10), consistent  
367 with previous findings (Kite et al. 1998). Further research using Gas Chromatography -  
368 Electroantennography (Cork et al. 1990) could confirm which VOCs elicit species-specific  
369 responses, and whether these biologically active compounds are maintained at frequencies  
370 expected under balancing selection.

371

372 Adaptive plasticity is the optimal solution in situations of environmental heterogeneity when  
373 possible (Kawecki and Ebert 2004), and floral odor is known to vary with changing  
374 environmental conditions (Burkle and Runyon 2017). Recently, a “Genomic Storage Effect”  
375 has been proposed (Gulisija et al. 2016), whereby balanced polymorphism is promoted by  
376 adaptive plasticity resulting from temporally varying selection. In such a scenario, a portion of  
377 the population acts as a store of variation (i.e. compounds attractive to specific pollinators)  
378 until conditions (i.e. dominant pollinator species) change (Chesson 2000). We found that  
379 individuals from Neuchâtel and Cortaillod emitted proportionally lower quantities of indole  
380 following transplants to Forêt du Gâvre (Appendix S1, Figure S8). This result is likely due to  
381 a combination of high inter-individual variation in floral odor, and phenotypic plasticity driven  
382 by environmental variation. Furthermore, in the case of polyploids such as *A. maculatum*, the  
383 Genomic Storage Effect could even be at work at the within-individual level. Currently, it is  
384 not known whether *P. phalaenoides* and *P. grisescens* phenologies are influenced by  
385 environmental conditions; our data suggest that at least in Forêt du Gâvre, *P. phalaenoides* may  
386 emerge slightly later than *P. grisescens* (Appendix S1, Figure S4b). If environmental variation  
387 influences pollinator phenology, then plasticity in floral odor based on environmental cues

388 could enhance pollinator attraction. Consequently, plasticity may have contributed to the  
389 variation in the four candidate compounds linked to species-specific pollinator attraction  
390 (Appendix S1, Figure S11). However, in most cases, we did not observe significant shifts  
391 consistent with plasticity (Appendix S1, Figure Table S5). After correction for multiple testing,  
392 we only found a significant shift in the emission of unnamed sesquiterpene RI 1473 (correlated  
393 with *P. grisescens* attraction) when comparing native and transplanted inflorescences from  
394 Neuchâtel. This result demonstrates that the emission of some specific compounds may be  
395 influenced environmental variation. While we cannot yet fully disentangle plasticity from  
396 variation resulting from balancing selection, the high diversity in floral odor we observed in  
397 our common garden sites is unlikely to be the result of plasticity alone.

398

399 High gene flow may also lead to the maintenance of floral odor variation. The short adult  
400 lifespan (approx. one week) and limited dispersal capacity of Psychodidae (Lack and Diaz  
401 1991) implies that *A. maculatum* gene flow is likely driven by seed dispersal, which is mainly  
402 carried out by frugivorous birds (Snow and Snow 1988). There appears to be a strong barrier  
403 to gene flow between populations from north/central Europe and from Italy and the Balkans  
404 (Espíndola and Alvarez 2011), yet floral odor variation is shown to be widely maintained  
405 across this barrier, suggesting that — at least regionally — balancing selection driven by  
406 heterogenous pollinator community composition is at work, in association with some level of  
407 local adaptation and plasticity.

408

#### 409 Conclusion

410 While trait variation often appears to be more strongly influenced by spatial heterogeneity in  
411 selection than temporal heterogeneity (Hedrick 1986) – as demonstrated by the extensive  
412 literature on local adaptation in plants (Leimu and Fischer 2008; Anderson et al. 2011) – our

413 study highlights how temporal heterogeneity in pollinators may also be a contributing factor in  
414 maintaining highly diverse floral odor bouquets. Although earlier models could not always  
415 demonstrate the maintenance of polymorphism through temporal heterogeneity (Hedrick  
416 1976), recent models (e.g. Gulisija et al. 2016) provide a mechanism by which frequent shifts  
417 in pollinator communities may maintain trait variation and counteract local adaptation. To date,  
418 almost all studies have sampled floral odors and pollinators at a single timepoint — possibly  
419 contributing to the numerous cases where floral odor diversity appears to exceed pollinator  
420 diversity (Delle-Vedove et al. 2017). Further research on the temporal dynamics of pollinator  
421 communities has the potential to advance our understanding on how and why many flowering  
422 plant lineages maintain high diversity in key traits such as floral odor.

423 **ACKNOWLEDGEMENTS**

424 We thank Gregory Roeder for his assistance with the processing of our VOC samples, Jérôme  
425 Albre for his assistance in Psychodidae identification, and Alberto Garcia Jimenez and Monica  
426 Fleisher for their dedicated assistance during our field sampling. We also thank Laurent  
427 Oppliger and colleagues at the Jardin Botanique de Neuchâtel for their support in hosting and  
428 maintaining our experimental populations of *Arum* inflorescences. The project was funded by  
429 the Swiss National Science Foundation through grant 31003A\_163334 awarded to N.A and  
430 S.R.

431 **REFERENCES**

- 432 Ackerman, J.D., Cuevas, A.A. & Hof, D. (2011). Are deception-pollinated species more  
433 variable than those offering a reward? *Plant Systematics and Evolution*, 293, 91–99.
- 434 Anderson, J.T., Willis, J.H. & Mitchell-Olds, T. (2011). Evolutionary genetics of plant  
435 adaptation. *Trends in Genetics*, 27, 258–266.
- 436 Andersson, S., Nilsson, L.A., Groth, I. & Bergström, G. (2002). Floral scents in butterfly-  
437 pollinated plants: possible convergence in chemical composition. *Botanical Journal of*  
438 *the Linnean Society*, 140, 129–153.
- 439 Ayasse, M., Schiestl, F.P., Paulus, H.F., Löfstedt, C., Hansson, B., Ibarra, F., *et al.* (2000).  
440 Evolution Of Reproductive Strategies In The Sexually Deceptive Orchid *Ophrys*  
441 *Sphegodes*: How Does Flower-Specific Variation Of Odor Signals Influence  
442 Reproductive Success? *Evolution*, 54, 1995–2006.
- 443 Ayasse, M., Schiestl, F.P., Paulus, H.F., Ibarra, F. & Francke, W. (2003). Pollinator attraction  
444 in a sexually deceptive orchid by means of unconventional chemicals. *Proceedings of*  
445 *the Royal Society of London. Series B: Biological Sciences*, 270, 517–522.
- 446 Bertram, J. & Masel, J. (2019). Density-dependent selection and the limits of relative fitness.  
447 *Theoretical Population Biology*, 129, 81–92.
- 448 Breitkopf, H., Schlüter, P.M., Xu, S., Schiestl, F.P., Cozzolino, S. & Scopece, G. (2013).  
449 Pollinator shifts between *Ophrys sphegodes* populations: might adaptation to different  
450 pollinators drive population divergence? *Journal of Evolutionary Biology*, 26, 2197–  
451 2208.
- 452 Bröderbauer, D., Weber, A. & Diaz, A. (2013). The design of trapping devices in pollination  
453 traps of the genus *Arum* (Araceae) is related to insect type. *Botanical Journal of the*  
454 *Linnean Society*, 172, 385–397.

455

- 456 Burkle, L.A. & Runyon, J.B. (2017). The Smell of Environmental Change: Using Floral Scent  
457 to Explain Shifts in Pollinator Attraction. *Applications in Plant Sciences*, 5, 1600123.
- 458 Burkle, L.A., Glenny, W.R. & Runyon, J.B. (2020). Intraspecific and interspecific variation in  
459 floral volatiles over time. *Plant Ecology*, 221, 529–544.
- 460 Campbell, D.R., Sosenski, P.A. & Raguso, R. (2019). Phenotypic plasticity of floral volatiles  
461 in response to increasing drought stress. *Annals of Botany*, 123, 601–610.
- 462 Chartier, M., Pélozuelo, L. & Gibernau, M. (2011). Do floral odor profiles geographically vary  
463 with the degree of specificity for pollinators? Investigation in two sapromyophilous  
464 *Arum* species (Araceae). *Annales de la Société entomologique de France*, 47, 71–77.
- 465 Chartier, M., Pélozuelo, L., Buatois, B., Bessière, J.-M. & Gibernau, M. (2013). Geographical  
466 variations of odour and pollinators, and test for local adaptation by reciprocal  
467 transplant of two European *Arum* species. *Functional Ecology*, 27, 1367–1381.
- 468 Chess, S.K.R., Raguso, R.A. & Lebuhn, G. (2008). Geographic divergence in floral  
469 morphology and scent in *Linanthus dichotomus* (Polemoniaceae). *American Journal*  
470 *of Botany*, 95, 1652–1659.
- 471 Chesson, P. (2000). Mechanisms of Maintenance of Species Diversity. *Annual Review of*  
472 *Ecology and Systematics*, 31, 343–366.
- 473 Cork, A., Beever, P.S., Gough, A.J.E. & Hall, D.R. (1990). Gas Chromatography Linked to  
474 Electroantennography: A Versatile Technique for Identifying Insect Semiochemicals.  
475 *Chromatography and Isolation of Insect Hormones and Pheromones*, 271–279.
- 476 Crepet, W.L. & Niklas, K.J. (2009). Darwins second “abominable mystery”: Why are there so  
477 many angiosperm species? *American Journal of Botany*, 96, 366–381.
- 478 Darwin, C. (1903). *More letters of Charles Darwin*. D. Appleton and Co., New York, NY.  
479  
480

- 481 Delle-Vedove, R., Juillet, N., Bessière, J.-M., Grison, C., Barthes, N., Paillet, T., *et al.* (2011).  
482 Colour-scent associations in a tropical orchid: Three colours but two odours.  
483 *Phytochemistry*, 72, 735–742.
- 484 Delle-Vedove, R., Schatz, B. & Dufay, M. (2017). Understanding intraspecific variation of  
485 floral scent in light of evolutionary ecology. *Annals of Botany*, 120, 1–20.
- 486 Delph, L.F. & Kelly, J.K. (2013). On the importance of balancing selection in plants. *New*  
487 *Phytologist*, 201, 45–56.
- 488 Diaz, A. & Kite, G.C. (2002). A comparison of pollination ecology of *Arum maculatum* and *A.*  
489 *italicum* in England. *Watsonia*, 24, 171–181.
- 490 Dobson, H.E.M. & Bergström, G.E.M. (2000). The ecology and evolution of pollen odors.  
491 *Plant Systematics and Evolution*, 222, 63–87.
- 492 Dormer, K.J. (1960). The Truth About Pollination In *Arum*. *New Phytologist*, 59, 298–301.
- 493 Dormont, L., Joffard, N. & Schatz, B. (2019). Intraspecific Variation in Floral Color and Odor  
494 in Orchids. *International Journal of Plant Sciences*, 180, 1036–1058.
- 495 du Plessis, M., Johnson, S.D., Nicolson, S.W., Bruyns, P.V. & Shuttleworth, A. (2018).  
496 Pollination of the “carrion flowers” of an African stapeliad (*Ceropegia mixta*:  
497 Apocynaceae): the importance of visual and scent traits for the attraction of flies. *Plant*  
498 *Systematics and Evolution*, 304, 357–372.
- 499 Espíndola, A., Pellissier, L. & Alvarez, N. (2010). Variation in the proportion of flower visitors  
500 of *Arum maculatum* along its distributional range in relation with community-based  
501 climatic niche analyses. *Oikos*, 120, 728–734.
- 502 Espíndola, A. & Alvarez, N. (2011). Comparative Phylogeography in a Specific and Obligate  
503 Pollination Antagonism. *PLoS ONE*, 6, e28662.
- 504
- 505

- 506 Farré-Armengol, G., Fernández-Martínez, M., Filella, I., Junker, R.R. & Peñuelas, J. (2020).  
507 Deciphering the Biotic and Climatic Factors That Influence Floral Scents: A  
508 Systematic Review of Floral Volatile Emissions. *Frontiers in Plant Science*, 11, 1154.
- 509 Faucheux, M.J. & Gibernau, M. (2011). Antennal sensilla in five Psychodini moth flies  
510 (Diptera: Psychodidae: Psychodinae) pollinators of *Arum* spp. (Araceae). *Annales de*  
511 *la Société entomologique de France*, 47, 89–100.
- 512 Fishbein, M. & Venable, D.L. (1996). Diversity and Temporal Change in the Effective  
513 Pollinators of *Asclepias Tuberosa*. *Ecology*, 77, 1061–1073.
- 514 Friberg, M., Schwind, C., Raguso, R.A. & Thompson, J.N. (2013). Extreme divergence in  
515 floral scent among woodland star species (*Lithophragma* spp.) pollinated by floral  
516 parasites. *Annals of Botany*, 111, 539–550.
- 517 Geber, M.A. (2011). Ecological and Evolutionary Limits to Species Geographic Ranges. *The*  
518 *American Naturalist*, 178, S1, S1–S5.
- 519 Gervasi, D.D.L. & Schiestl, F.P. (2017). Real-time divergent evolution in plants driven by  
520 pollinators. *Nature Communications*, 8, 14691.
- 521 Gibernau, M., Macquart, D. & Przetak, G. (2004). Pollination in the Genus *Arum* - a Review.  
522 *Aroideana*, 27, 148–166.
- 523 Gigord, L.D.B., Macnair, M.R. & Smithson, A. (2001). Negative frequency-dependent  
524 selection maintains a dramatic flower color polymorphism in the rewardless orchid  
525 *Dactylorhiza sambucina* (L.). *Proceedings of the National Academy of Sciences*, 98,  
526 6253–6255.
- 527 Gillespie, J.H. & Turelli, M. (1989). Genotype-environment interactions and the maintenance  
528 of polygenic variation. *Genetics*, 121, 129–138.
- 529  
530



- 531 Gould, B., Moeller, D.A., Eckhart, V.M., Tiffin, P., Fabio, E. & Geber, M.A. (2013). Local  
532 adaptation and range boundary formation in response to complex environmental  
533 gradients across the geographical range of *Clarkia xantiana* ssp. *xantiana*. *Journal of*  
534 *Ecology*, 102, 95–107.
- 535 Goyret, J., Markwell, P.M. & Raguso, R.A. (2007). The effect of decoupling olfactory and  
536 visual stimuli on the foraging behavior of *Manduca sexta*. *Journal of Experimental*  
537 *Biology*, 210, 1398–1405.
- 538 Grant, V. (1949). Pollination Systems As Isolating Mechanisms In Angiosperms. *Evolution*, 3,  
539 82–97.
- 540 Gross, K., Sun, M. & Schiestl, F.P. (2016). Why Do Floral Perfumes Become Different?  
541 Region-Specific Selection on Floral Scent in a Terrestrial Orchid. *Plos One*, 11,  
542 e0147975.
- 543 Gulisija, D., Kim, Y. & Plotkin, J.B. (2016). Phenotypic Plasticity Promotes Balanced  
544 Polymorphism in Periodic Environments by a Genomic Storage Effect. *Genetics*, 202,  
545 1437–1448.
- 546 Gómez, J.M., Abdelaziz, M., Camacho, J.P.M., Muñoz-Pajares, A.J. & Perfectti, F. (2009).  
547 Local adaptation and maladaptation to pollinators in a generalist geographic mosaic.  
548 *Ecology Letters*, 12, 672–682.
- 549 Haverkamp, A., Hansson, B.S., Baldwin, I.T., Knaden, M. & Yon, F. (2018). Floral Trait  
550 Variations Among Wild Tobacco Populations Influence the Foraging Behavior of  
551 Hawkmoth Pollinators. *Frontiers in Ecology and Evolution*, 6.
- 552 Hedrick, P.W. (1976). Genetic variation in a heterogeneous environment. II. Temporal  
553 heterogeneity and directional selection. *Genetics*, 84, 145–150.
- 554 Hedrick, P.W. (1986). Genetic Polymorphism in Heterogeneous Environments: A Decade  
555 Later. *Annual Review of Ecology and Systematics*, 17, 535–566.

- 556 Henslow, G. (1888). *The origin of floral structures through insect and other agencies*. D.  
557 Appleton & Co., New York, NY.
- 558 Hernández-Hernández, T. & Wiens, J.J. (2020). Why are there so many flowering plants? A  
559 multi-scale analysis of plant diversification. *The American Naturalist*, 195, 948–963.
- 560 Hetherington-Rauth, M.C. & Ramírez, S.R. (2016). Evolution and diversity of floral scent  
561 chemistry in the euglossine bee-pollinated orchid genus *Gongora*. *Annals of Botany*,  
562 118, 135–148.
- 563 Hijmans, R.J., Cameron, S.E., Parra, J.L., Jones, P.G. & Jarvis, A. (2005). Very high resolution  
564 interpolated climate surfaces for global land areas. *International Journal of*  
565 *Climatology*, 25, 1965–1978.
- 566 Holopainen, J. (2004). Multiple functions of inducible plant volatiles. *Trends in Plant Science*,  
567 9, 529–533.
- 568 Ibanez, S., Dötterl, S., Anstett, M.-C., Baudino, S., Caissard, J.-C., Gallet, C., *et al.* (2010).  
569 The role of volatile organic compounds, morphology and pigments of globeflowers in  
570 the attraction of their specific pollinating flies. *New Phytologist*, 188, 451–463.
- 571 Jersáková, J., Kindlmann, P. & Renner, S.S. (2006). Is the colour dimorphism in *Dactylorhiza*  
572 *sambucina* maintained by differential seed viability instead of frequency-dependent  
573 selection? *Folia Geobotanica*, 41, 61–76.
- 574 Junker, R.R. & Parachnowitsch, A.L. (2015). Working Towards a Holistic View on Flower  
575 Traits— How Floral Scents Mediate Plant–Animal Interactions in Concert with Other  
576 Floral Characters. *Journal of the Indian Institute of Science*, 95, 43–67.
- 577 Kawecki, T.J. & Ebert, D. (2004). Conceptual issues in local adaptation. *Ecology Letters*, 7,  
578 1225–1241.
- 579 Kevan, P.G. & Baker, H.G. (1983). Insects as Flower Visitors and Pollinators. *Annual Review*  
580 *of Entomology*, 28, 407–453.

- 581 Kite, G.C., Hettterscheid, W.L.A., Lewis, M.J., Boyce, P.C., Ollerton, J., Cocklin, E., *et al.*  
582 (1998). Inflorescence odours and pollinators of *Arum* and *Amorphophallus* (Araceae).  
583 In: *Reproductive Biology* (eds. Rudall, S.J. & Owens, P.J.). Royal Botanic Garden,  
584 Kew, pp. 295–315.
- 585 Kite, G.C. (1995). The floral odour of *Arum maculatum*. *Biochemical Systematics and Ecology*,  
586 23, 343–354.
- 587 Klahre, U., Gurba, A., Hermann, K., Saxenhofer, M., Bossolini, E., Guerin, P.M., *et al.* (2011).  
588 Pollinator Choice in *Petunia* Depends on Two Major Genetic Loci for Floral Scent  
589 Production. *Current Biology*, 21, 730–739.
- 590 Knudsen, J.T. & Gershenzon, J. (2020). The Chemical Diversity of Floral Scent. In: *Biology*  
591 *of Plant Volatiles* (eds. Pichersky, E. & Dudareva, N.). CRC Press, pp. 57–78.
- 592 Lack, A.J. & Diaz, A.J. (1991). The pollination of *Arum maculatum* L. – a historical review  
593 and new observations. *Watsonia*, 18, 333–342.
- 594 Leimu, R. & Fischer, M. (2008). A Meta-Analysis of Local Adaptation in Plants. *PLoS ONE*,  
595 3, e4010.
- 596 Liaw, A. & Wiener, M. (2002). Classification and Regression by randomForest. *R News* 2, 18-  
597 22.
- 598 Mable, B.K., Brysting, A.K., Jørgensen, M.H., Carbonell, A.K.Z., Kiefer, C., Ruiz-Duarte, P.,  
599 *et al.* (2018). Adding Complexity to Complexity: Gene Family Evolution in  
600 Polyploids. *Frontiers in Ecology and Evolution*, 6, 114.
- 601 Majetic, C.J., Raguso, R.A. & Ashman, T.-L. (2009). Sources of floral scent  
602 variation: can environment define floral scent phenotype? *Plant Signaling &  
603 Behavior*, 4, 129–131.
- 604  
605

- 606 Marotz-Clausen, G., Jürschik, S., Fuchs, R., Schäffler, I., Sulzer, P., Gibernau, M., *et al.*  
607 (2018). Incomplete synchrony of inflorescence scent and temperature patterns in *Arum*  
608 *maculatum* L. (Araceae). *Phytochemistry*, 154, 77–84.
- 609 Oksanen, J., Blanchet, F.G., Friendly, M., Kindt, R., Legendre, P., McGlenn, D., Minchin, P.R.,  
610 O'Hara, R.B., Simpson, G.L., Solymos, P., Stevens, M.H.H., Szoecs, E. & Wagner, H.  
611 (2019). *vegan: Community Ecology Package*. R package version 2.5-6  
612 <https://CRAN.R-project.org/package=vegan>
- 613 Parachnowitsch, A.L., Manson, J.S. & Sletvold, N. (2018). Evolutionary ecology of nectar.  
614 *Annals of Botany*, 123, 247–261.
- 615 Pellegrino, G., Caimi, D., Noce, M.E. & Musacchio, A. (2005). Effects of local density and  
616 flower colour polymorphism on pollination and reproduction in the rewardless orchid  
617 *Dactylorhiza sambucina* (L.). *Plant Systematics and Evolution*, 251, 119–129.
- 618 Peter, C.I. & Johnson, S.D. (2013). A pollinator shift explains floral divergence in an orchid  
619 species complex in South Africa. *Annals of Botany*, 113, 277–288.
- 620 Price, M.V., Waser, N.M., Irwin, R.E., Campbell, D.R. & Brody, A.K. (2005). Temporal And  
621 Spatial Variation In Pollination Of A Montane Herb: A Seven-Year Study. *Ecology*,  
622 86, 2106–2116.
- 623 R Core Team (2019). R: A language and environment for statistical computing. R Foundation  
624 for Statistical Computing, Vienna, Austria. <https://www.R-project.org/>
- 625 Raguso, R.A., Schlumpberger, B.O., Kaczorowski, R.L. & Holtsford, T.P. (2006).  
626 Phylogenetic fragrance patterns in *Nicotiana* sections *Alatae* and *Suaveolentes*.  
627 *Phytochemistry*, 67, 1931–1942.
- 628 Raguso, R.A. (2008a). Wake Up and Smell the Roses: The Ecology and Evolution of Floral  
629 Scent. *Annual Review of Ecology, Evolution, and Systematics*, 39, 549–569.
- 630

- 631 Raguso, R.A. (2008b). Start making scents: the challenge of integrating chemistry into  
632 pollination ecology. *Entomologia Experimentalis et Applicata*, 128, 196–207.
- 633 Raven, P.H. (1977). A Suggestion Concerning the Cretaceous Rise to Dominance of the  
634 Angiosperms. *Evolution*, 31, 451.
- 635 Renner, S.S. (2006). Rewardless flowers in the angiosperms and the role of insect cognition in  
636 their evolution. In: *Plant–pollinator interactions: from specialization to generalization*  
637 (eds. Waser, N.M. & Ollerton, J.). University of Chicago, Chicago, IL, pp. 123–144.
- 638 Saabas, A. (2019) Treeinterpreter library. <https://github.com/andosa/treeinterpreter>
- 639 Salzmann, C.C., Nardella, A.M., Cozzolino, S. & Schiestl, F.P. (2007). Variability in Floral  
640 Scent in Rewarding and Deceptive Orchids: The Signature of Pollinator-imposed  
641 Selection? *Annals of Botany*, 100, 757–765.
- 642 Sayers, T.D.J., Steinbauer, M.J., Farnier, K. & Miller, R.E. (2020). Dung mimicry in  
643 *Typhonium* (Araceae): explaining floral trait and pollinator divergence in a widespread  
644 species complex and a rare sister species. *Botanical Journal of the Linnean Society*,  
645 193, 375–401.
- 646 Schemske, D.W. & Horvitz, C.C. (1989). Temporal Variation in Selection on a Floral  
647 Character. *Evolution*, 43, 461.
- 648 Schiestl, F.P. & Johnson, S.D. (2013). Pollinator-mediated evolution of floral signals. *Trends*  
649 *in Ecology & Evolution*, 28, 307–315.
- 650 Schiestl, F.P., Kirk, H., Bigler, L., Cozzolino, S. & Desurmont, G.A. (2014). Herbivory and  
651 floral signaling: phenotypic plasticity and tradeoffs between reproduction and indirect  
652 defense. *New Phytologist*, 203, 257–266.
- 653 Snow, B. & Snow, D. (1988). *Birds and berries*. Calton Poyser, Staffordshire.
- 654 Sprengel, C.K. (1793). *Das entdeckte Geheimniss der Natur im Bau und in der Befruchtung*  
655 *der Blumen*. Vieweg, Berlin.

- 656 Suinyuy, T.N. & Johnson, S.D. (2018). Geographic variation in cone volatiles and pollinators  
657 in the thermogenic African cycad *Encephalartos ghellinckii* Lem. *Plant Biology*, 20,  
658 579–590.
- 659 Suinyuy, T.N., Donaldson, J.S. & Johnson, S.D. (2012). Geographical variation in cone volatile  
660 composition among populations of the African cycad *Encephalartos villosus*.  
661 *Biological Journal of the Linnean Society*, 106, 514–527.
- 662 Sun, M., Gross, K. & Schiestl, F.P. (2013). Floral adaptation to local pollinator guilds in a  
663 terrestrial orchid. *Annals of Botany*, 113, 289–300.
- 664 Svensson, G.P., Hickman, M.O., Bartram, S., Boland, W., Pellmyr, O. & Raguso, R.A. (2005).  
665 Chemistry and geographic variation of floral scent in *Yucca filamentosa* (Agavaceae).  
666 *American Journal of Botany*, 92, 1624–1631.
- 667 Turco, A., Medagli, P., Albano, A. & Demerico, S. (2014). Karyomorphometry on three  
668 polyploid species of *Arum* L. (Araceae, Aroideae). *Comparative Cytogenetics*, 8, 71–  
669 80.
- 670 Urru, I., Stensmyr, M.C. & Hansson, B.S. (2011). Pollination by brood-site deception.  
671 *Phytochemistry*, 72, 1655–1666.
- 672 van der Niet, T. & Johnson, S.D. (2012). Phylogenetic evidence for pollinator-driven  
673 diversification of angiosperms. *Trends in Ecology & Evolution*, 27, 353–361.
- 674 Weber, U.K., Nuismer, S.L. & Espíndola, A. (2019). Patterns of floral morphology in relation  
675 to climate and floral visitors. *Annals of Botany*, 125, 433–445.
- 676 Whitehead, M.R. & Peakall, R. (2009). Integrating floral scent, pollination ecology and  
677 population genetics. *Functional Ecology*, 23, 863–874.
- 678 Wittmann, M.J., Bergland, A.O., Feldman, M.W., Schmidt, P.S. & Petrov, D.A. (2017).  
679 Seasonally fluctuating selection can maintain polymorphotrim at many loci via  
680 segregation lift. *Proceedings of the National Academy of Sciences*, 114.

681 **TABLES**

682 **Table 1.** Proportional VOC blend compositions of 147 *Arum maculatum* individuals from 11  
 683 populations. The average blends for both K-medoids (PAM) clusters identified in this study are shown  
 684 below, and visualized in Appendix S1, Figure S7.

| <b>Compound</b>                              | <b>K1 (%)<br/>N=97</b> | <b>K2 (%)<br/>N=50</b> |
|----------------------------------------------|------------------------|------------------------|
| 2-heptanone                                  | 1.84                   | 1.19                   |
| $\beta$ -citronellene                        | 4.31                   | 2.09                   |
| cis $\beta$ -ocimene                         | 0.47                   | 0.54                   |
| p-cresol                                     | 1.68                   | 0.94                   |
| <b>indole ***</b>                            | <b>24.35</b>           | <b>65.39</b>           |
| <b>skatole ***</b>                           | <b>2.52</b>            | <b>1.03</b>            |
| $\alpha$ -copaene                            | 0.14                   | 0.76                   |
| <b>Z-caryophyllene *</b>                     | <b>8.37</b>            | <b>3.28</b>            |
| <b><math>\beta</math>-caryophyllene *</b>    | <b>2.59</b>            | <b>0.83</b>            |
| $\alpha$ -humulene                           | 6.68                   | 2.92                   |
| alloaromadendrene                            | 8.13                   | 3.45                   |
| $\beta$ -humulene                            | 3.54                   | 1.87                   |
| $\alpha$ -selinene                           | 0.44                   | 0.33                   |
| bicyclogermacrene                            | 7.76                   | 2.44                   |
| d-cadinene                                   | 2.11                   | 0.83                   |
| Unnamed sesquiterpene<br>(RI 1404)           | 4.97                   | 2.06                   |
| <b>Unnamed sesquiterpene<br/>(RI 1473) *</b> | <b>5.76</b>            | <b>2.37</b>            |
| Unnamed sesquiterpene<br>(RI 1681)           | 14.35                  | 7.70                   |

685 \* denotes compounds that vary significantly between groups (Kruskal-Wallis test,  $p < 0.05$ ,  $df = 1$ )

686 FIGURES

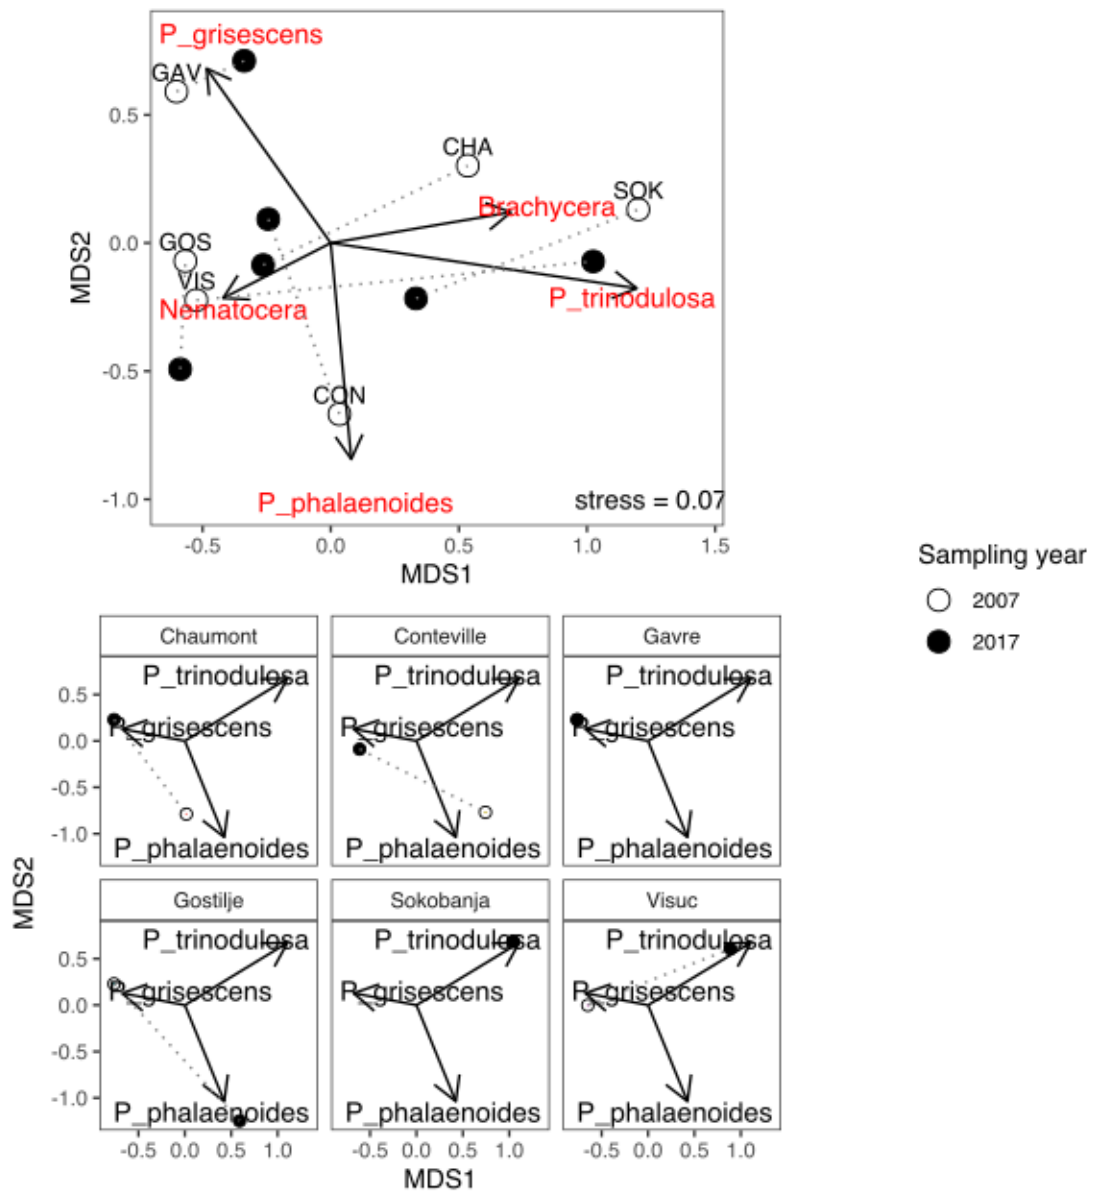

687 **Figure 1.** Shifts in the total pollinator communities (upper plot) and Psychodidae species (lower plots)  
688 trapped by *Arum maculatum* inflorescences. Over the past decade, the dominant Psychodid pollinator  
689 appears to have shifted in four out of six re-sampled populations.



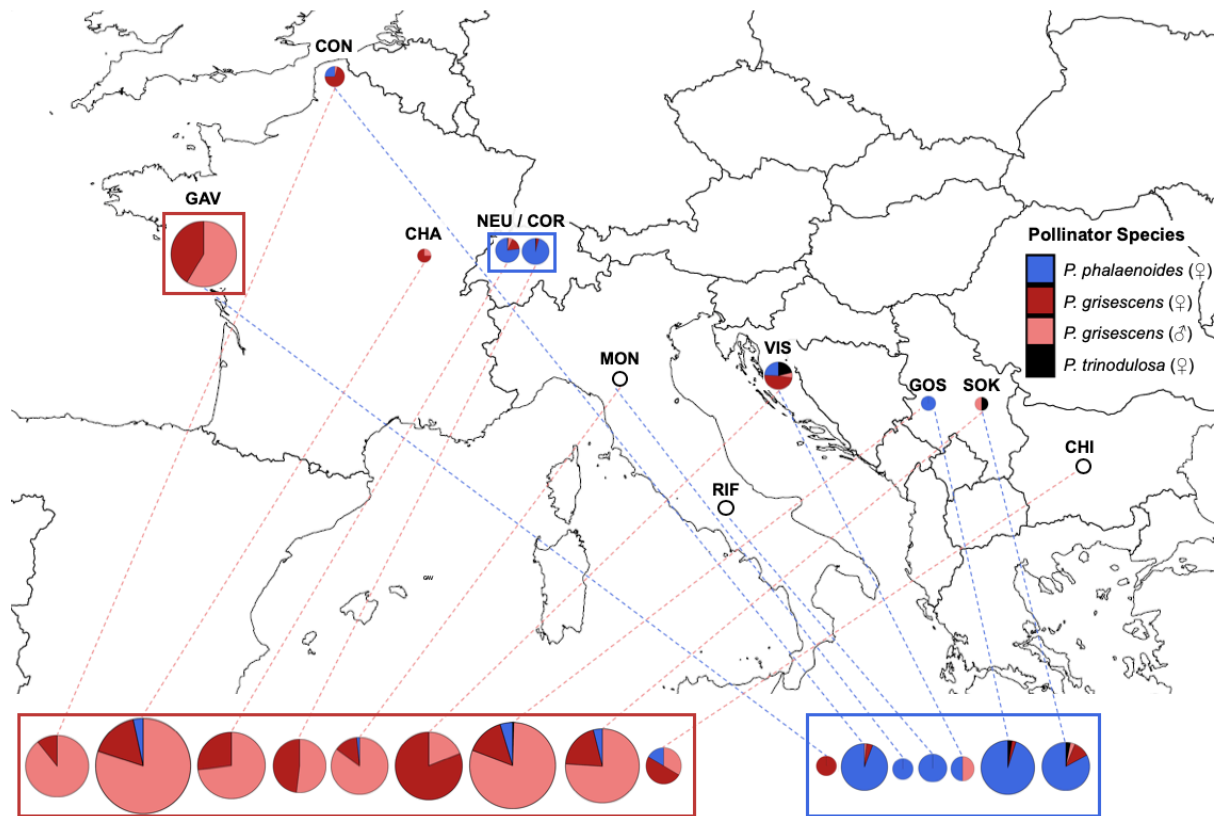

690

691 **Figure 2.** *Psychoda* spp. trapped by *Arum maculatum* inflorescences during field surveys, and  
692 following transplants to two common garden sites. Dotted lines link each field survey result (plots  
693 placed on the map) with the two corresponding transplant results (plots below map).

694 Note: Pie charts are scaled to represent the square root +1 (to visualize small differences) of the average  
695 number of Psychodidae per plant. Empty charts represent populations where inflorescences did not  
696 attract any Psychodidae during field surveys.

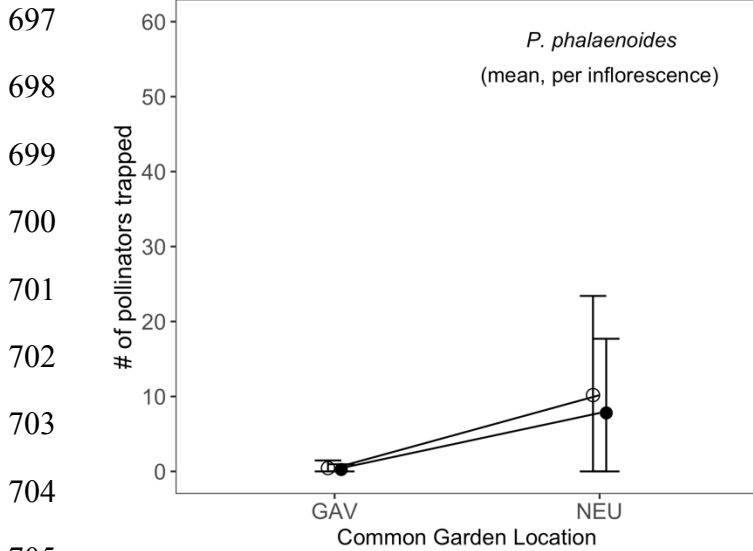

**Figure 3.** Mean ( $\pm$  SE) numbers of *Psychoda phalaenoides*, *Psycha grisescens*, and total insects trapped by inflorescences originating from *P. phalaenoides*-dominated sites (filled circles) and *P. grisescens*-dominated sites (hollow circles), in two common garden sites. No deme  $\times$  habitat interactions (indicative of local adaptation) were identified.

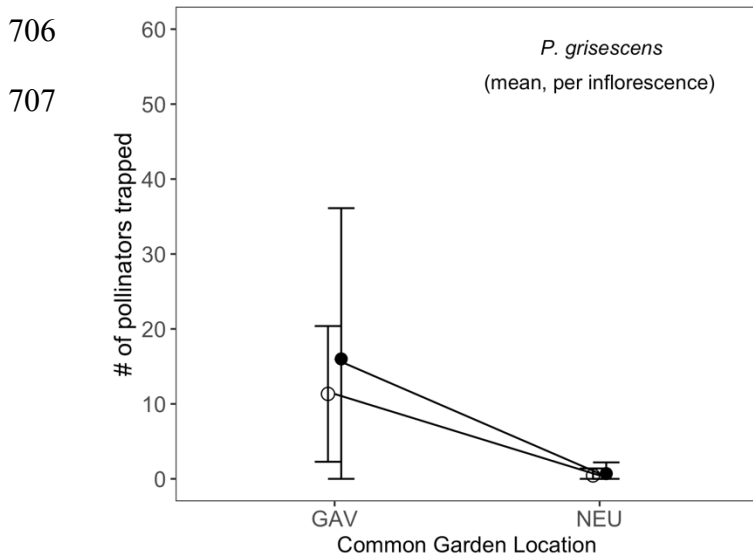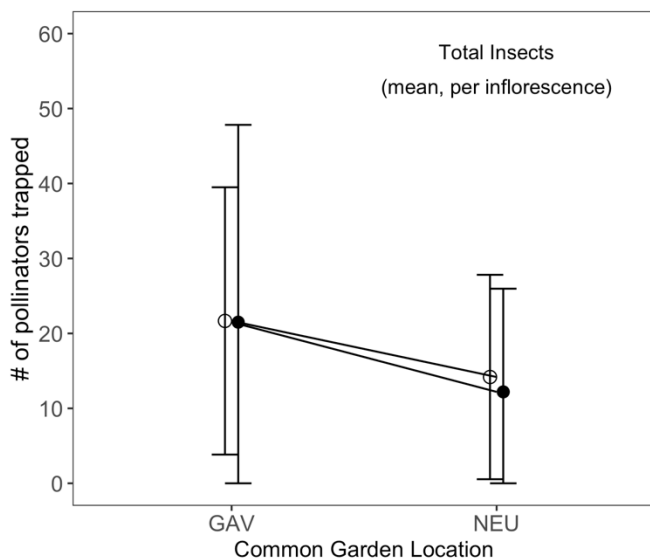

Native Pollinator ○ grisescens ● phalaenoides

708 **APPENDIX S1 – SUPPLEMENTARY FIGURES & TABLES**

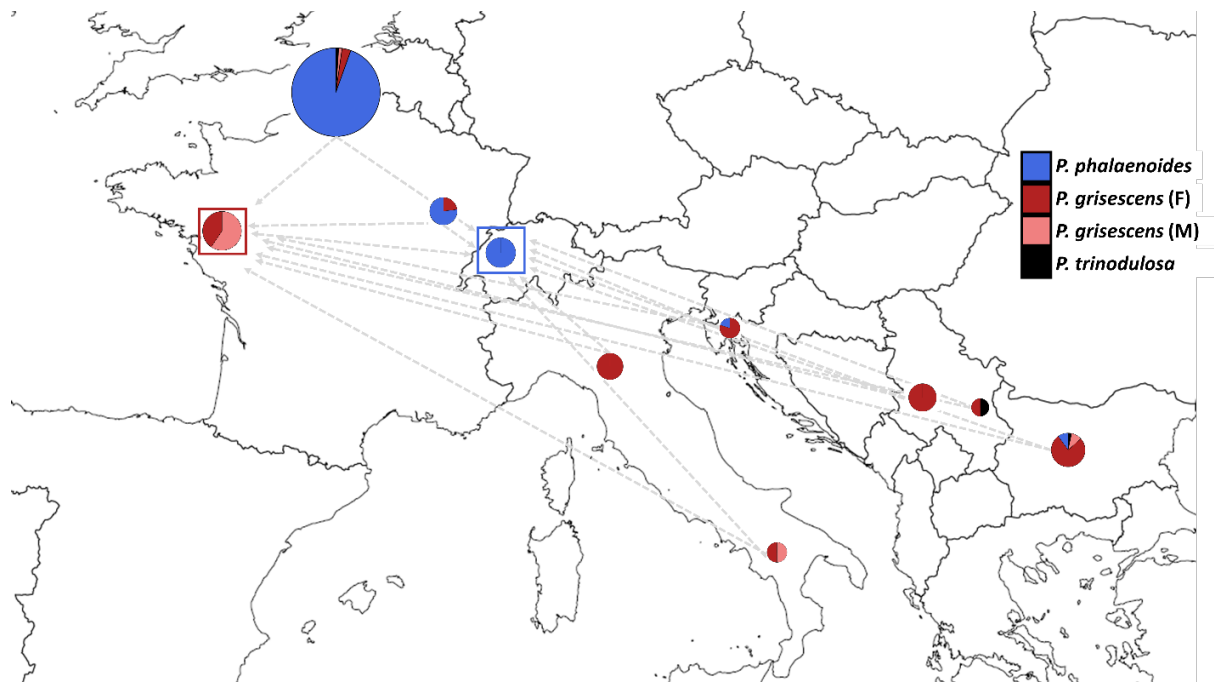

709 **Figure S1.** Outline of all *Arum maculatum* populations surveyed in this study, and the location of our  
710 two common garden sites (red and blue squares). Pie charts visualize data on *Psychoda* species caught  
711 by inflorescences between 2007-2009, taken from Espíndola et al. (2010). We attempted to re-survey  
712 each of these sites in this study between 2017 and 2019 (result shown in Figure 2).

713 Note: Graph sizes represent the square root (plus one to visualize species differences in small pies) of  
714 the mean number of psychodids per plant in each population. Gray dotted arrow indicate direction for  
715 transplanting a subset of inflorescences to both common garden sites. Swiss pollinator data in this figure  
716 represents Lausanne, replaced by Neuchâtel and Cortaillod populations in the present study.

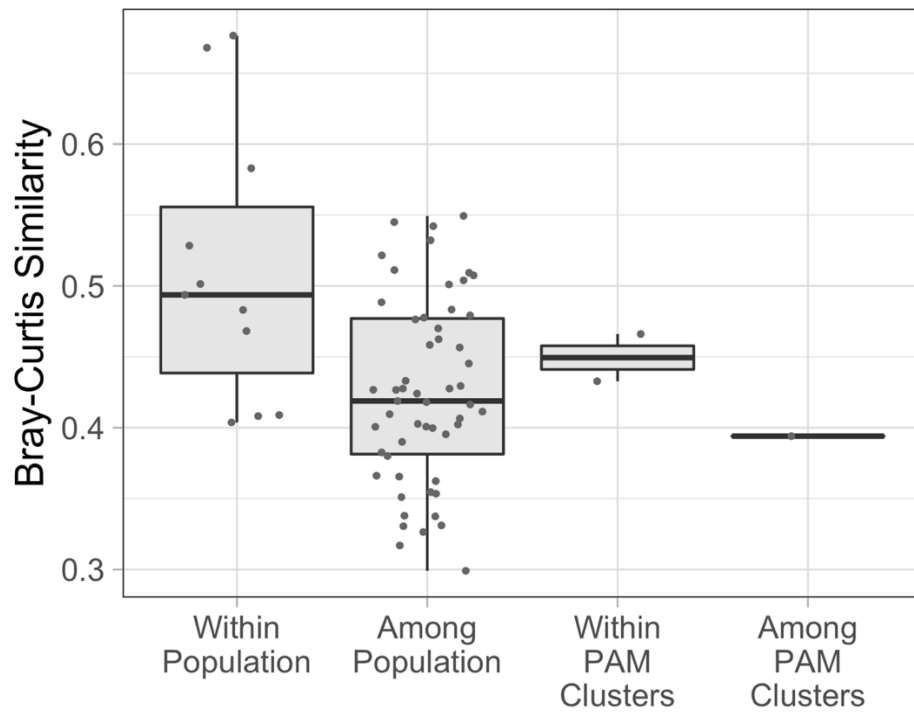

717

718 **Figure S2.** Pairwise Bray-Curtis similarity values from comparing *Arum maculatum* floral odors within  
719 and among all sampled populations, and within and among the two PAM clusters identified in this  
720 study.

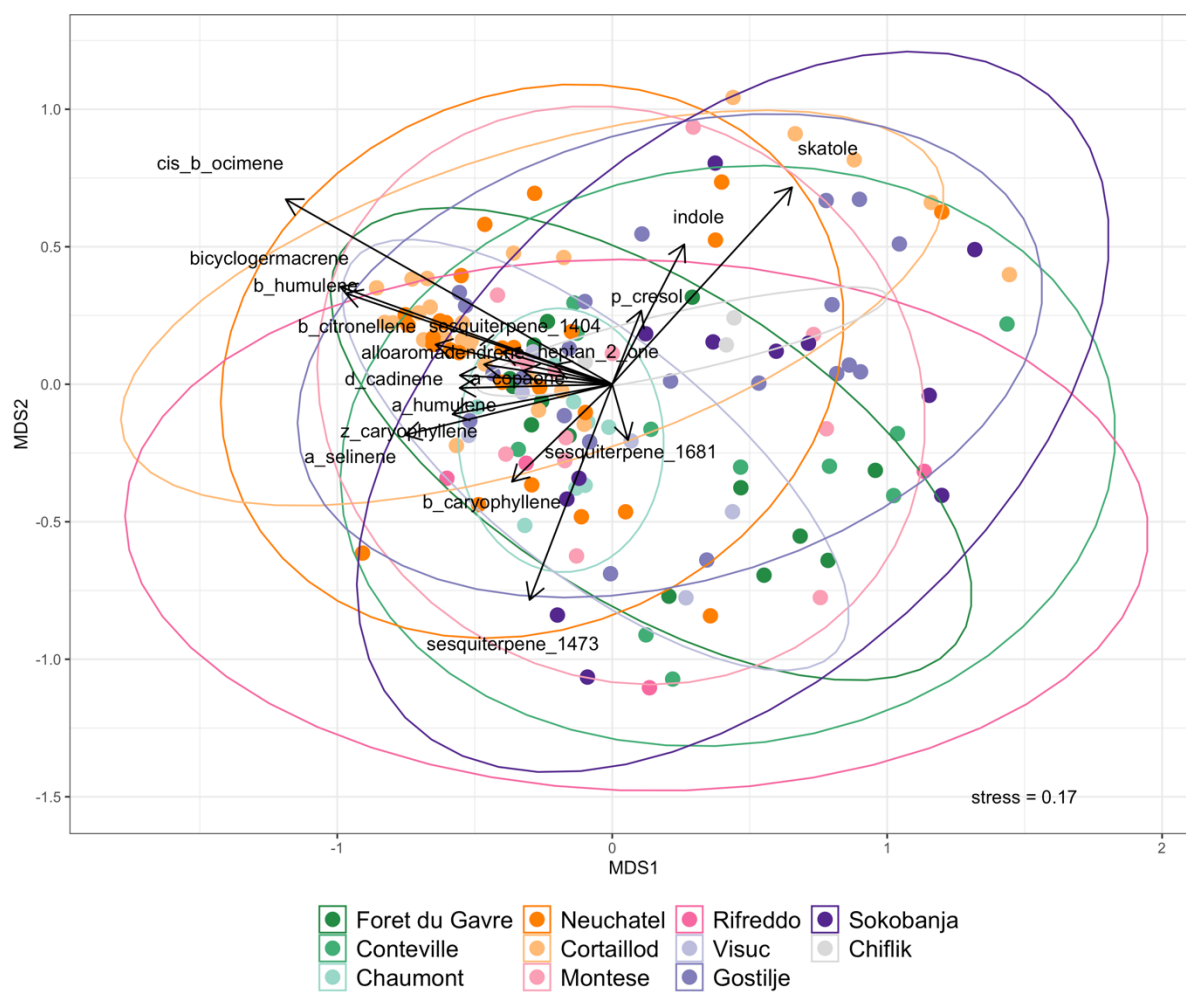

721 **Figure S3.** Multivariate representation of *Arum maculatum* volatile organic compound emissions, using  
722 nonmetric multidimensional scaling (NMDS) of Bray-Curtis distances between individuals, colored  
723 according to their population of origin.

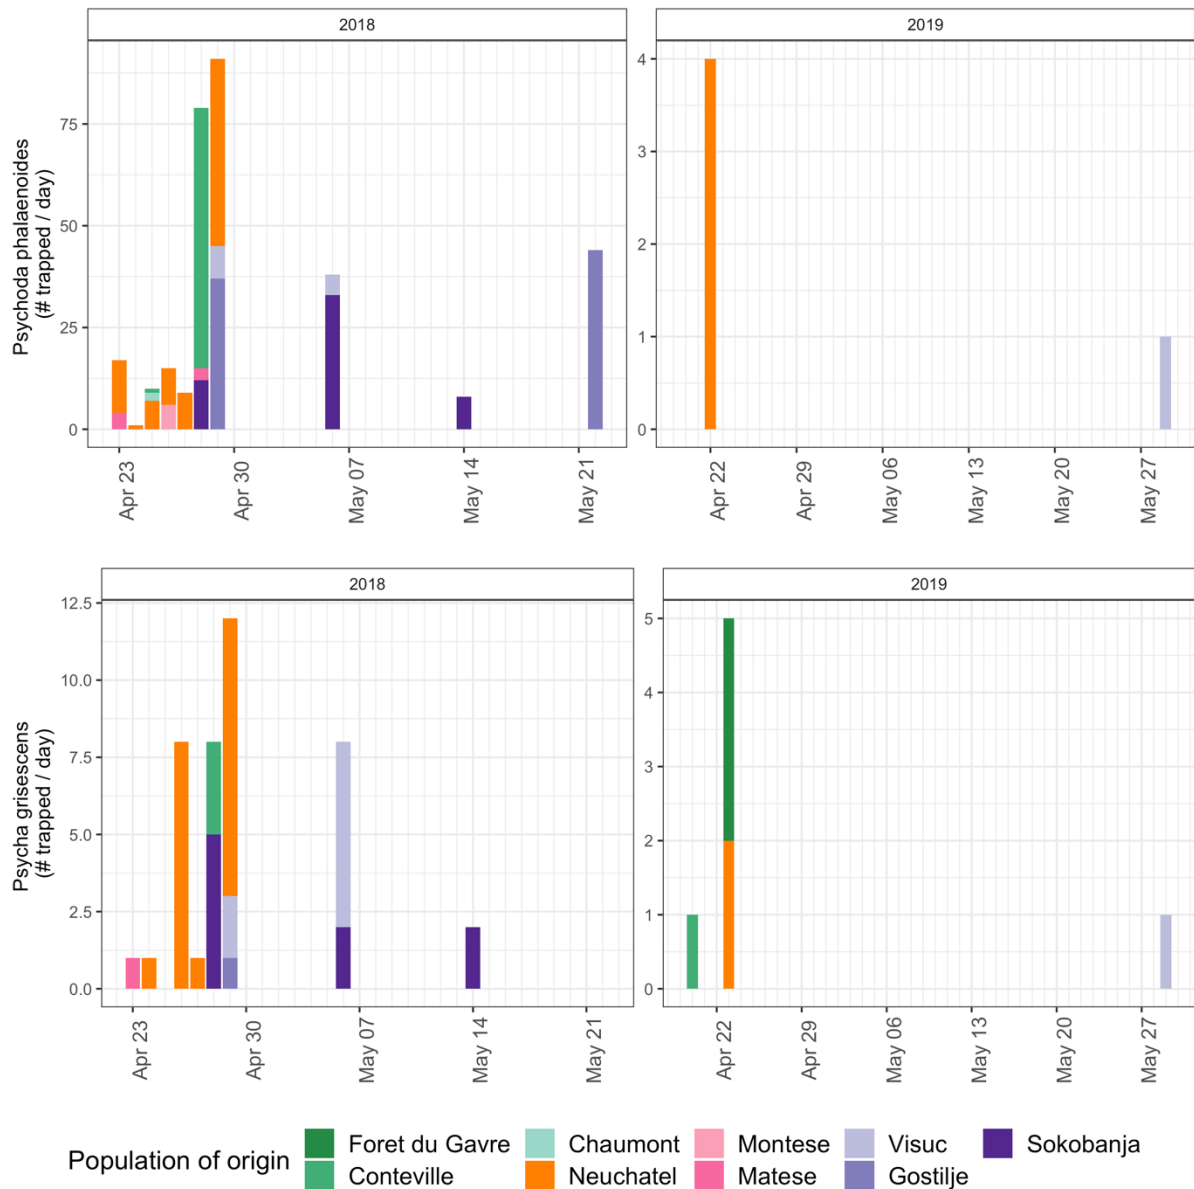

724

725 **Figure S4a.** Pollinators trapped by *Arum maculatum* inflorescences in the Neuchâtel common garden

726 (i.e. *Psychoda phalaenoides*-dominated) over two years of sampling. Both *P. phalaenoides* and *P.*

727 *griseascens* were present and trapped by inflorescences during most of the sampling season.

728 Note: Y-axis scale varies between plots. Bar colors represent the populations of origin for individual

729 inflorescences.

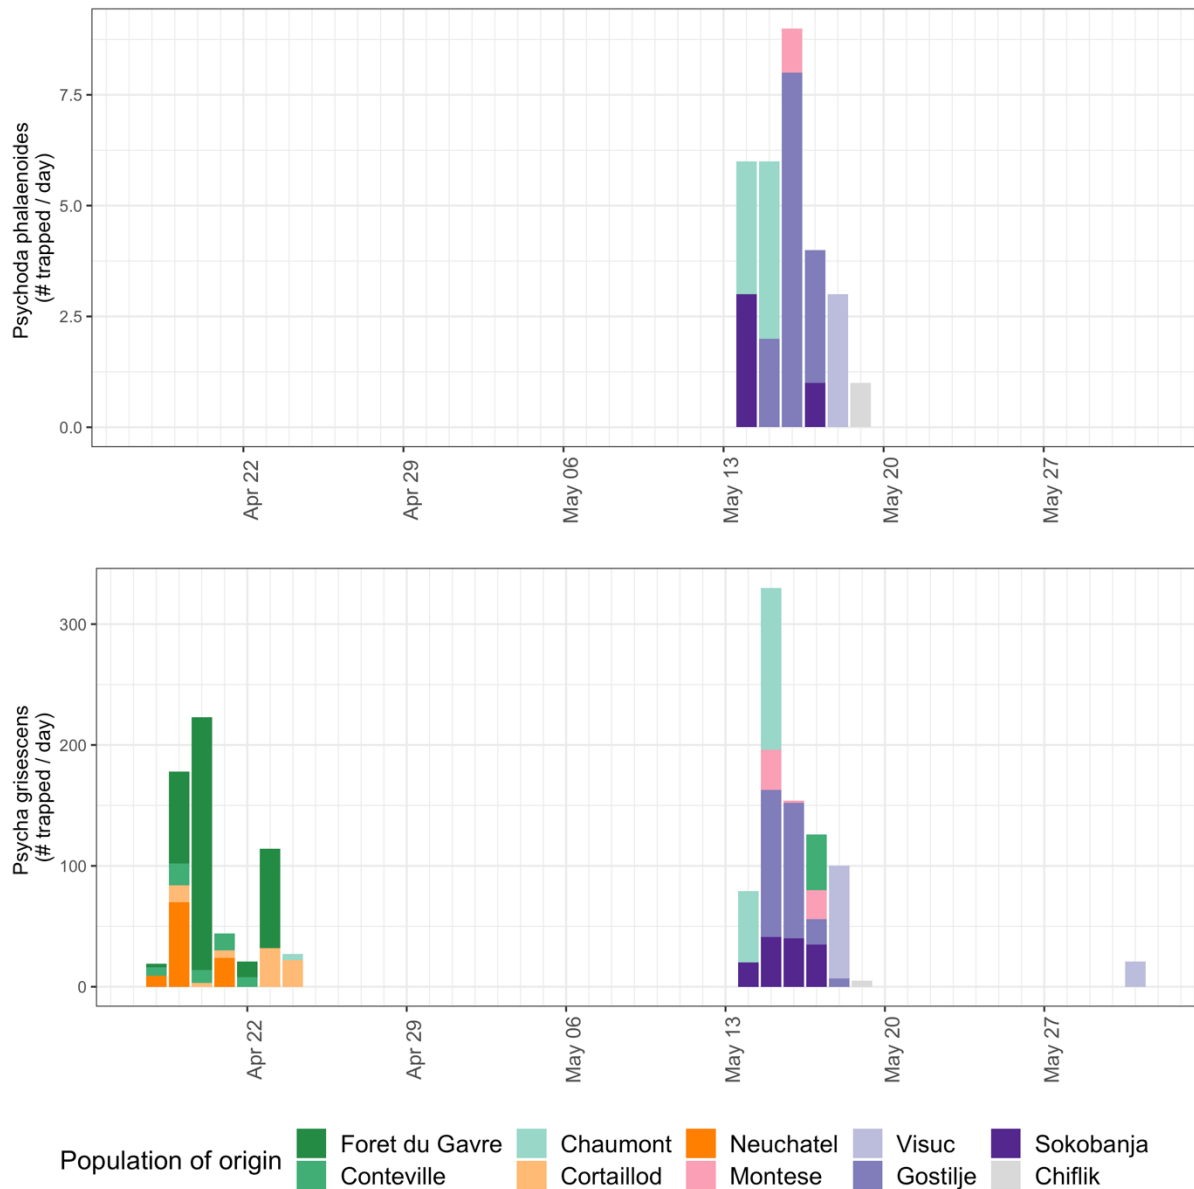

730

731 **Figure S4b.** Pollinators trapped by *Arum maculatum* inflorescences in the Forêt du Gâvre common

732 garden (i.e. *Psycha griseascens*-dominated) in 2019. *P. griseascens* were trapped by inflorescences over

733 most of the sampling season, while *P. phalaenoides* were only trapped in the latter half of the season.

734 Note: Y-axis scale varies substantially between plots. Bar colors represent the populations of origin for

735 individual inflorescences. No pollinator sampling was conducted between 25.Apr and 14.May.

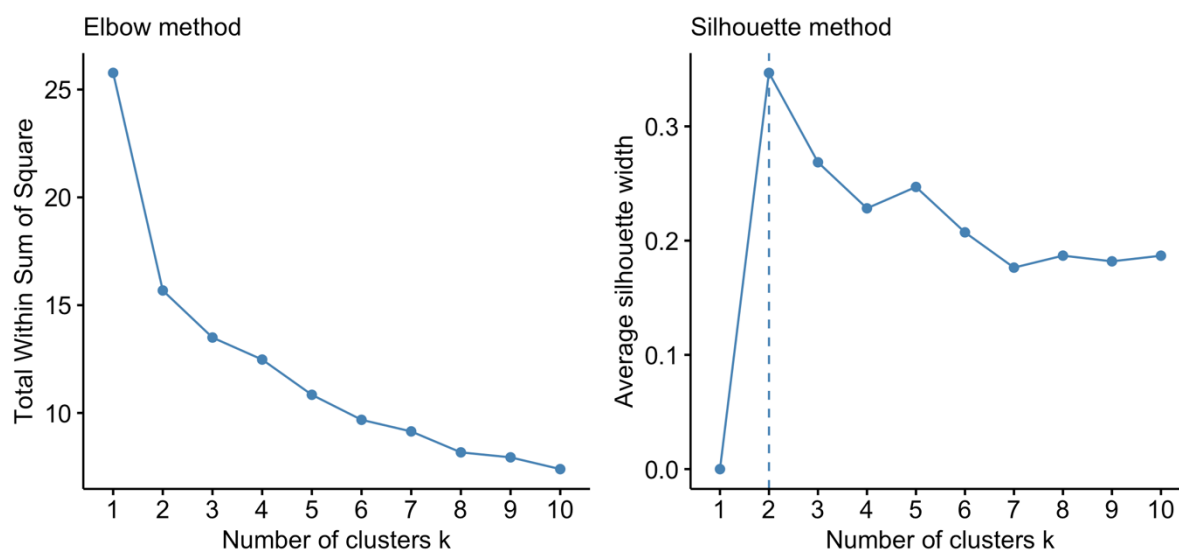

736 **Figure S5.** Cluster validation results using ‘Elbow’ and ‘Silhouette’ methods, for clustering of *Arum*  
737 *maculatum* floral odor bouquets into 2-10 groups, using the PAM algorithm. Two clusters appears to  
738 be the optimal number for our VOC dataset.



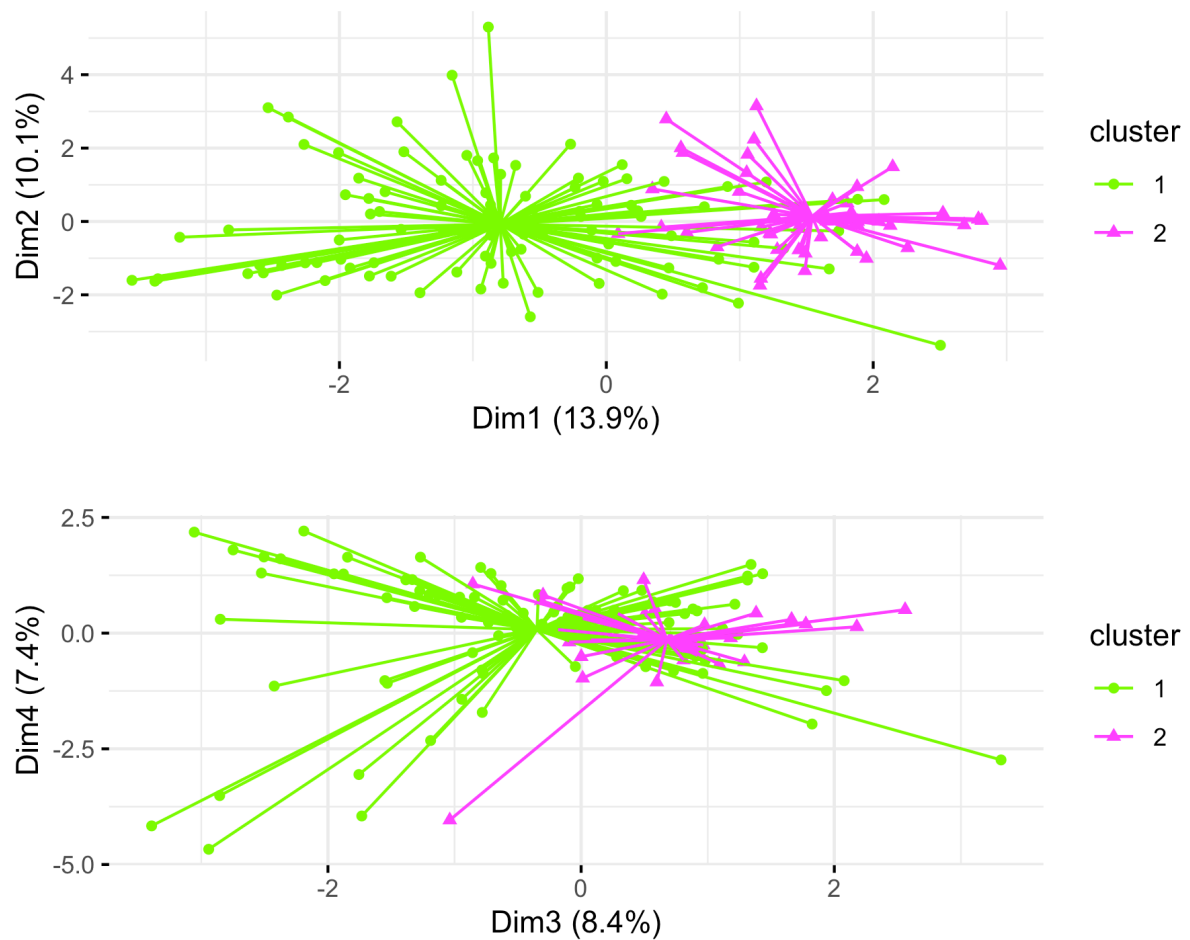

739 **Figure S6.** K-medoids (PAM) clustering plots highlighting the placement of *Arum maculatum*  
740 individuals into the two clusters we identified, along PCA axes 1 and 2 (upper plot) and 3 and 4 (lower  
741 plot).

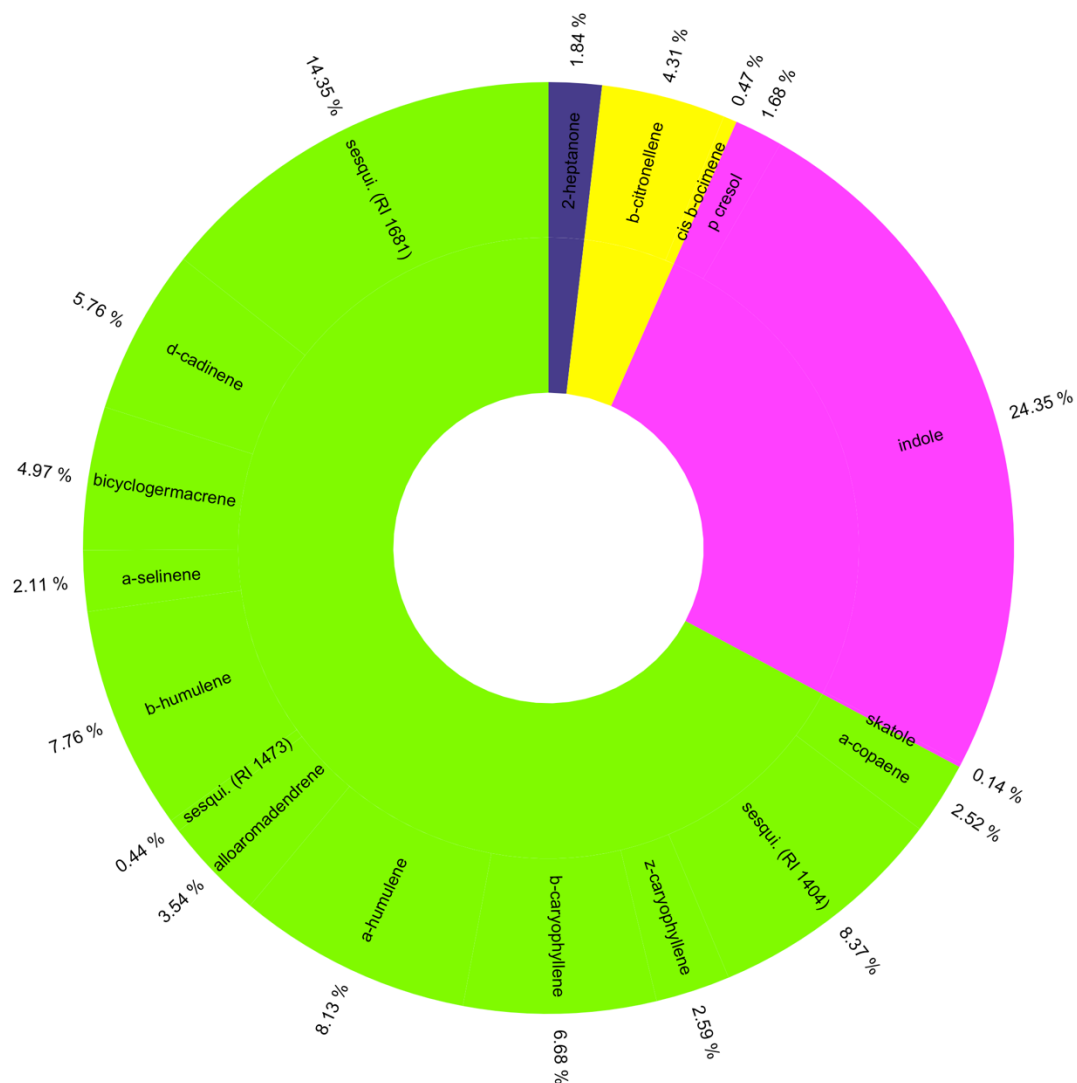

742 **Figure S7a.** The average composition of VOC blends of *Arum maculatum* inflorescences belonging to  
743 PAM Cluster 1. This cluster is mainly characterized by the proportionally large and diverse emissions  
744 of mono- and sesquiterpenes.

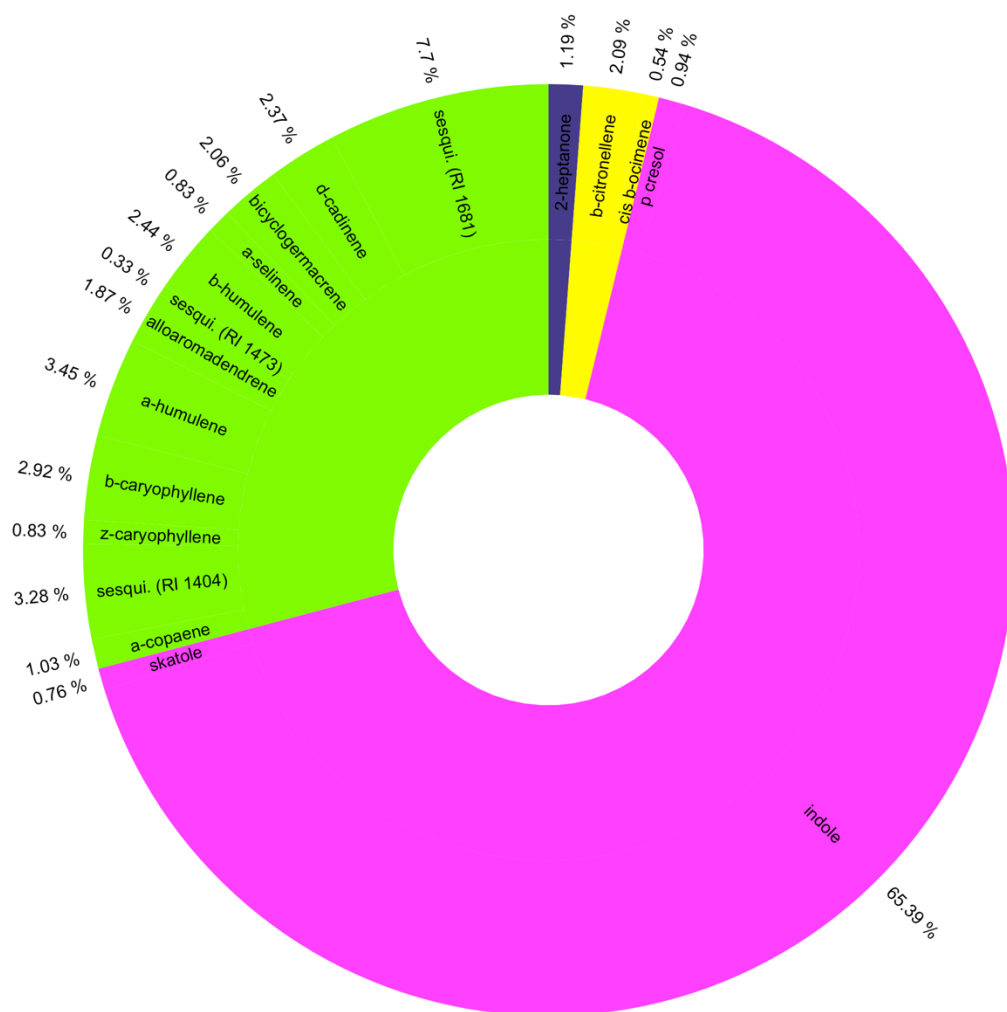

745 **Figure S7b.** The average composition of VOC blends of *Arum maculatum* inflorescences belonging to  
746 PAM Cluster 2. This cluster can be characterized by significantly higher emissions of indole than  
747 Cluster 1 ( $\chi^2 = 34.92$ ,  $p < 0.001$ ,  $df = 1$ ).

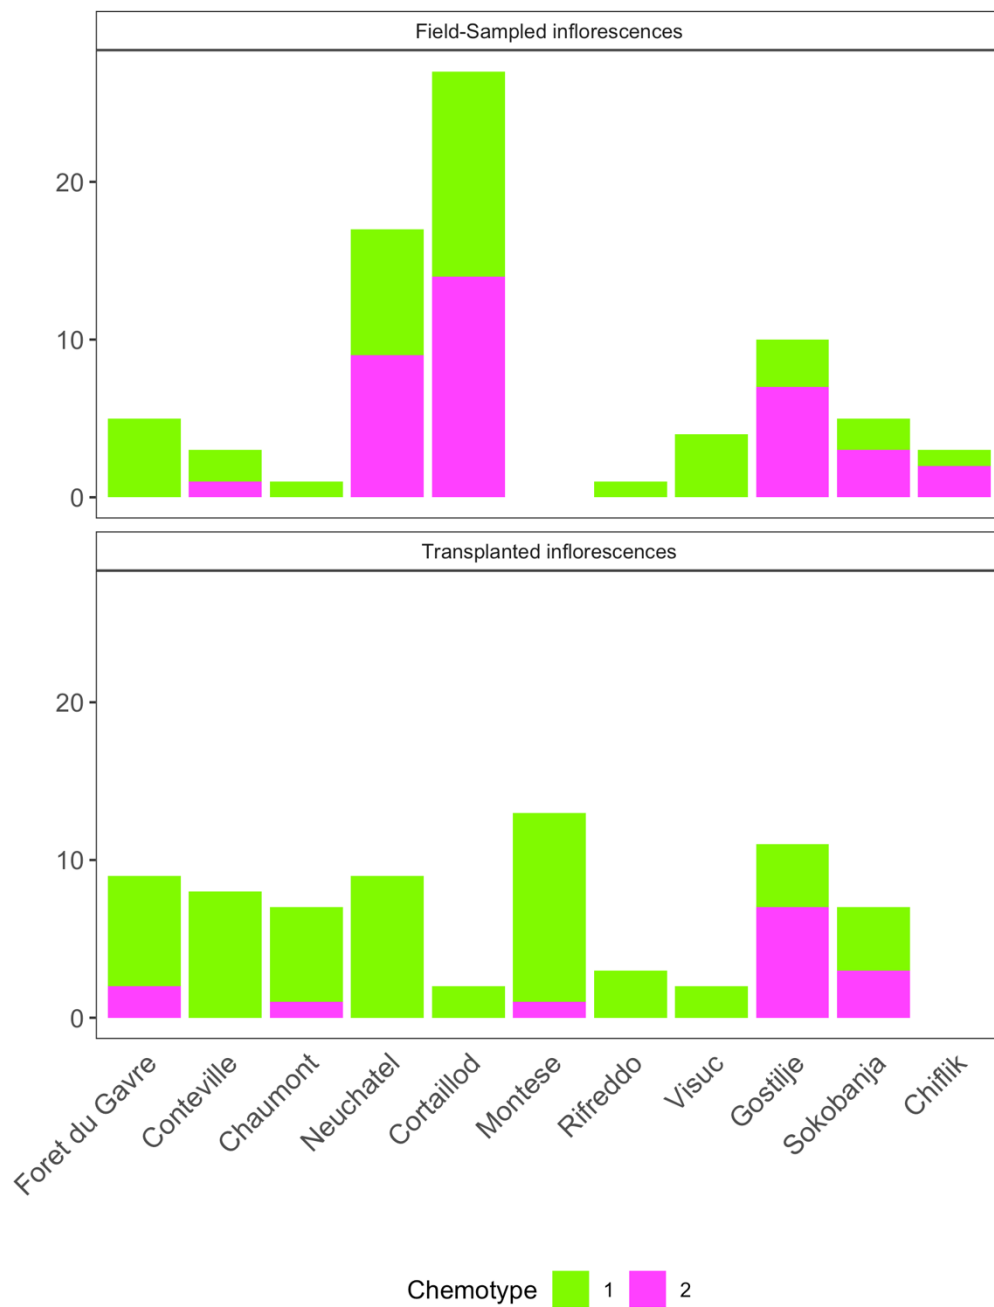

748 **Figure S8.** The number of *Arum maculatum* inflorescences assigned to terpenoid-dominated PAM  
749 Cluster 1, and indole-dominated PAM Cluster 2. *In situ* VOC samples are shown on the upper graph,  
750 while VOC samples from potted and transplanted individuals are shown in the lower graph. No VOCs  
751 were able to be sampled *in-situ* in Montese, and following transplants to common gardens for  
752 inflorescences from Chiflik.

A : *P. phalaenoides* - dominated sites

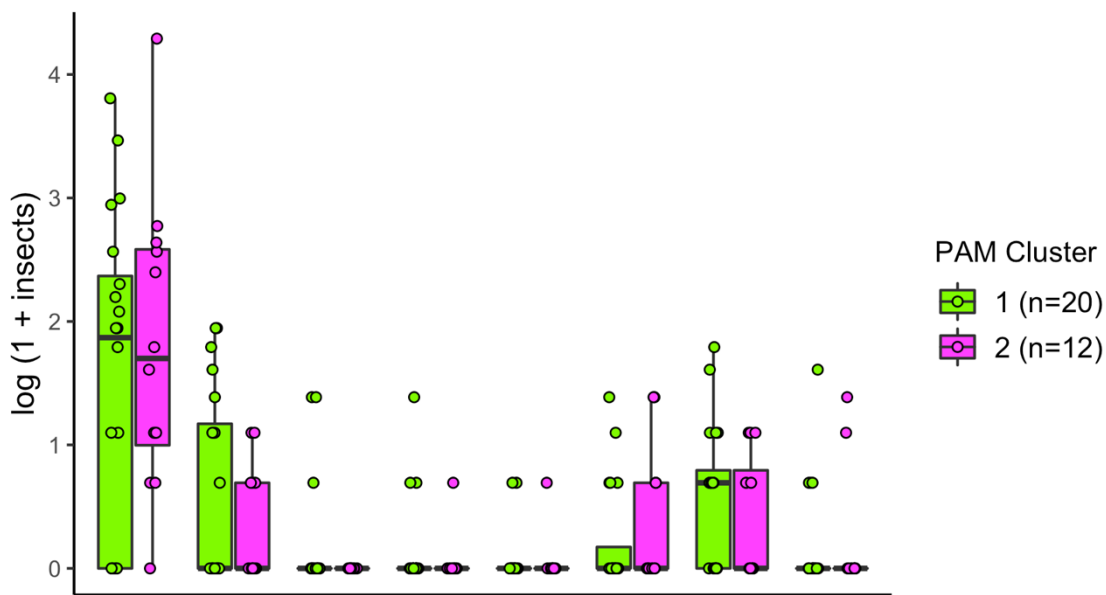

B : *P. grisescens* - dominated sites

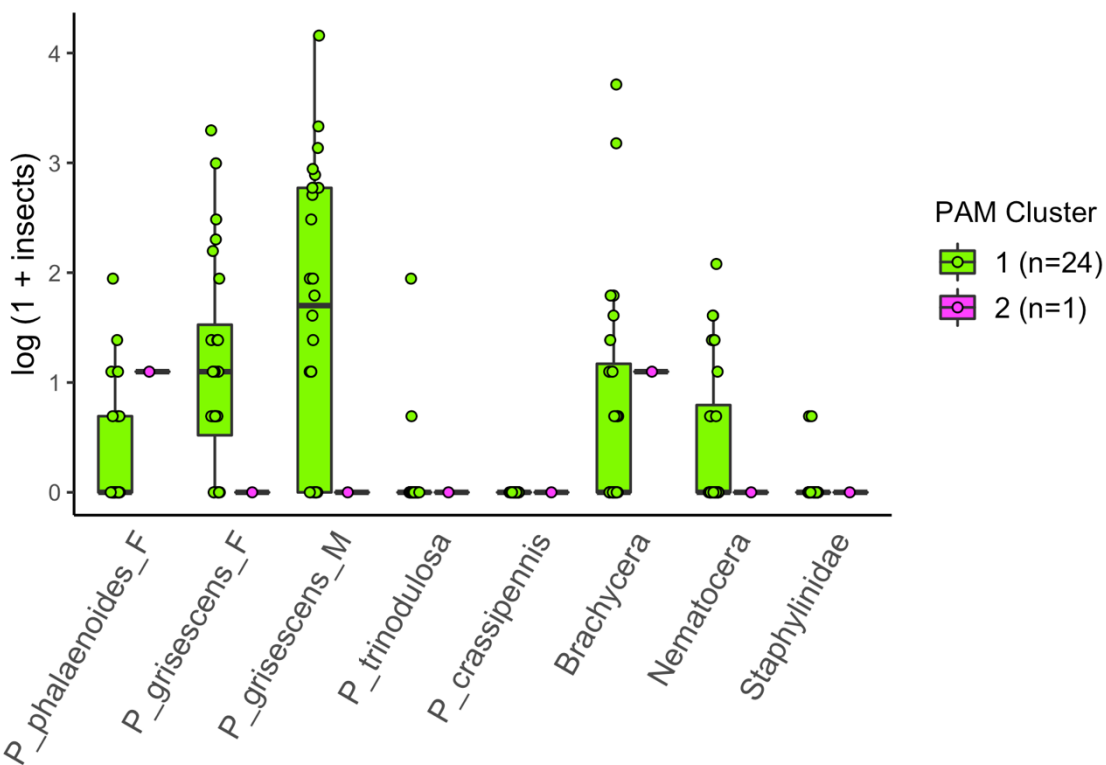

753 **Figure S9.** *log*<sub>1p</sub>-transformed abundances of pollinators trapped by *Arum maculatum* emitting high  
754 proportional quantities of terpenoids (PAM Cluster 1) and indole (PAM Cluster 2). To control for  
755 geographic variation in background pollinator communities among sampled sites, the visualization is  
756 split based on the dominant Psychodidae species where each sample was collected. Where possible, sex  
757 (M/F) is specified above; all *P. trinodulosa* and *P. crassipennis* we identified were female.

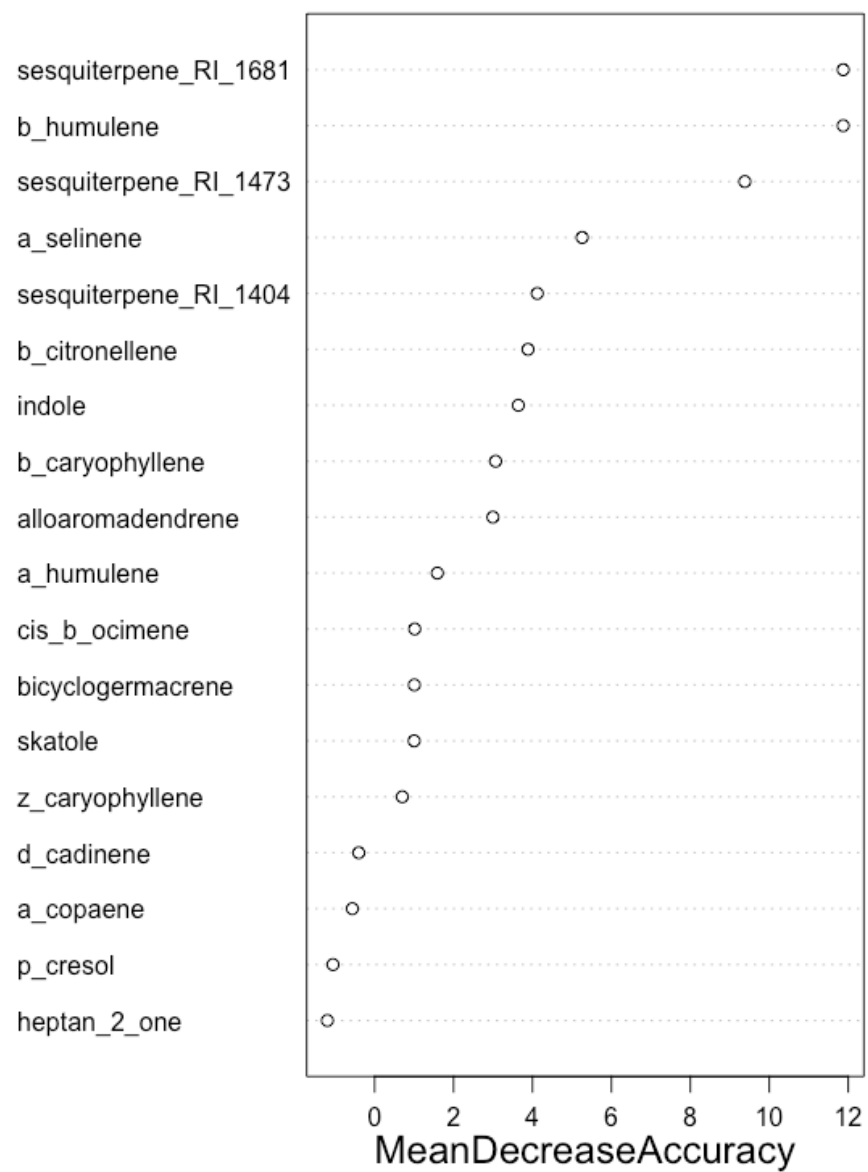

**Figure S10.** Variable importance plot highlighting the *Arum maculatum* VOCs with the greatest effect on the random forest model accuracy. Compounds such as  $\beta$ -humulene, unnamed sesquiterpenes (RI 1681 and 1473) and,  $\alpha$ -selinene were the strongest predictors of whether an inflorescence would trap predominantly *P. phalaenoides* or *P. grisescens*.

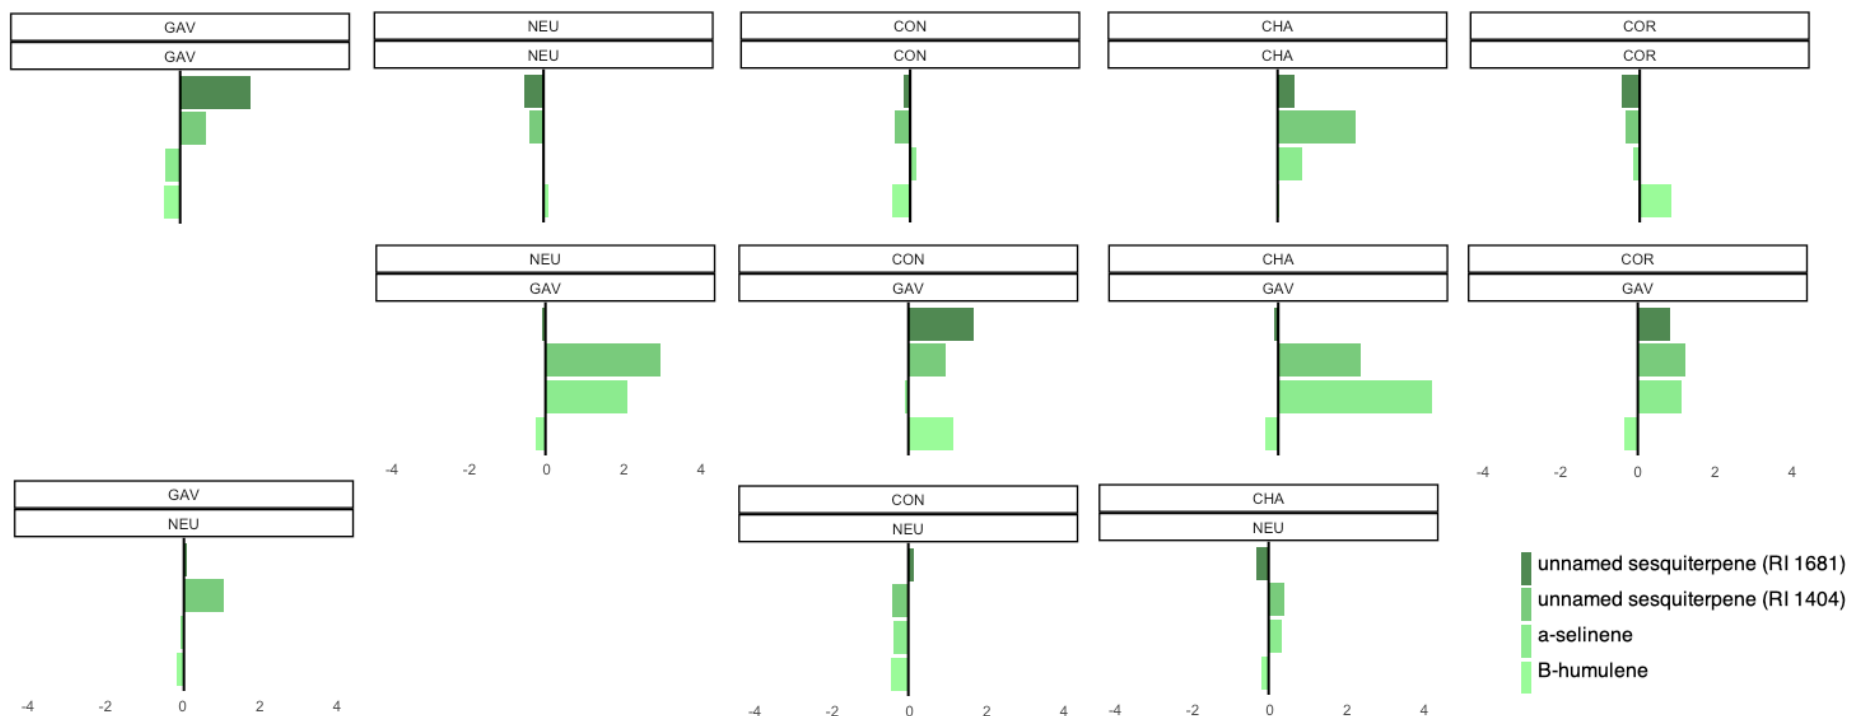

764 **Figure S11.** Shifts in the mean population standard scores (calculated as:  $[(\text{raw individual VOC quantity} - \text{mean individual VOC quantity}) / \text{VOC std. dev.}]$ )  
 765 for the four *Arum maculatum* VOCs which were the strongest predictors of whether an inflorescence would trap predominantly *P. phalaenoides* or *P. grisescens*.  
 766 Two Swiss populations (COR and NEU) and one Serbian population (GOS) shifted to more sesquiterpene-dominated blends following transplants to the Forêt  
 767 du Gâvre common garden. By contrast, most populations remained relatively consistent in their emissions of these sesquiterpenes following transplants to the  
 768 Neuchâtel common garden.  
 769 Note: Upper box represents population origin, lower box represents site where VOCs were collected. [FIGURE CONTINUED ON NEXT PAGE]

770

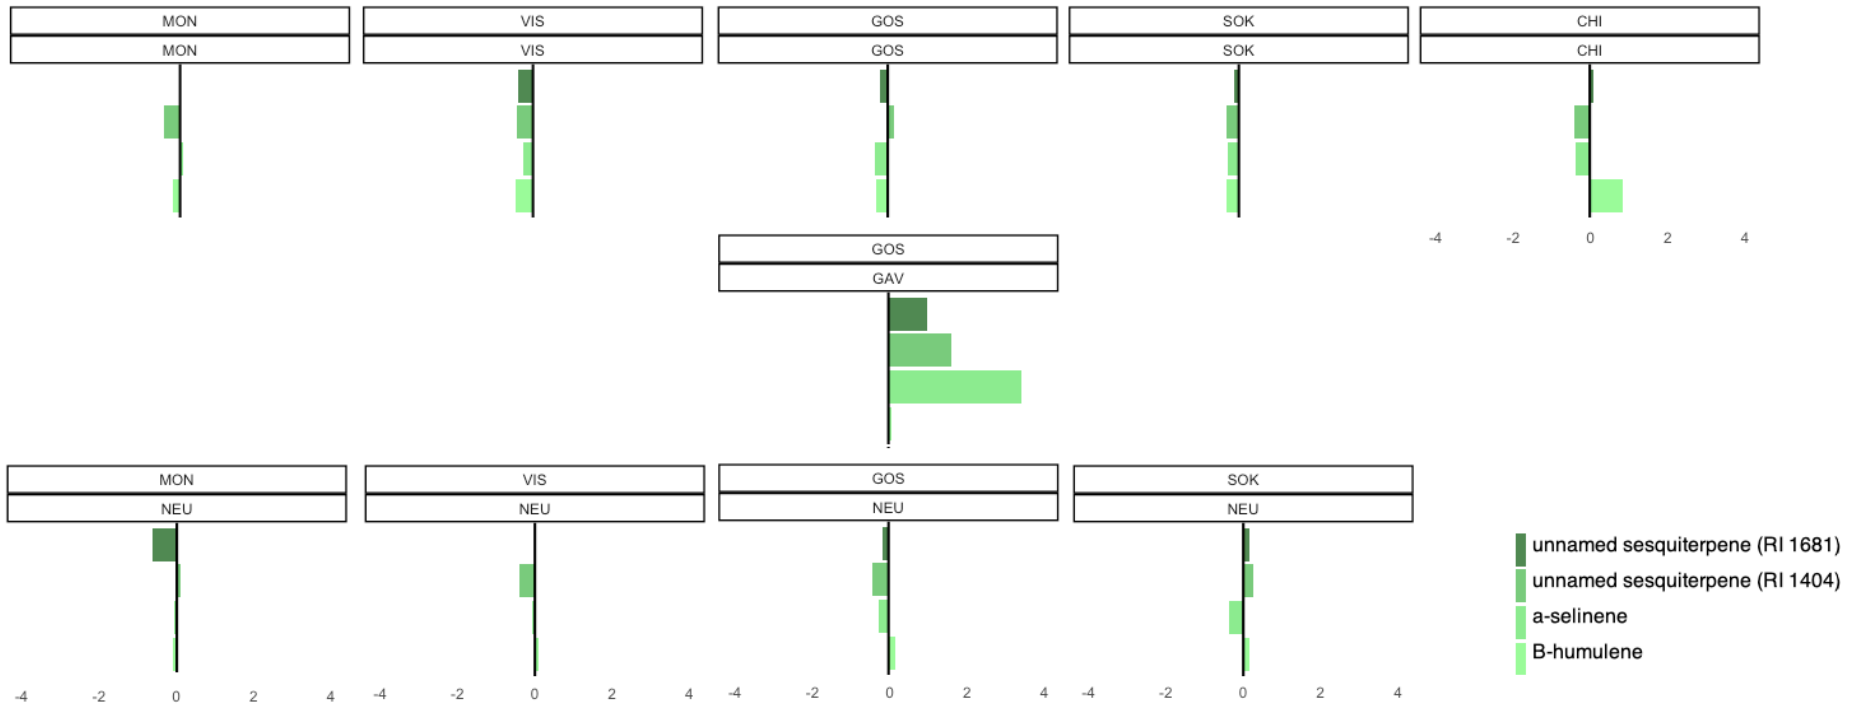

771 **Figure S11 (cont.)** – see caption on previous page



772 **Table S1.** List of study sites, GPS coordinates, number of *Arum maculatum* VOC samples passing all quality filters, and number of inflorescences with insect  
773 data, during both field collections and common garden experiments.

| Population     | Country | Lat.     | Long.    | Alt. ASL (m) | # sampled VOCs (in situ) | # sampled VOCs (NEU, transplant) | # sampled VOCs (GAV, transplant) | # sampled insects (in situ) | # sampled insects (NEU, transplant) | # sampled insects (GAV, transplant) |
|----------------|---------|----------|----------|--------------|--------------------------|----------------------------------|----------------------------------|-----------------------------|-------------------------------------|-------------------------------------|
| Forêt du Gâvre | FR      | 47.55066 | -1.86466 | 16           | 10                       | 4                                | NA                               | 5 (16)                      | 3 (3)                               | NA                                  |
| Conteville     | FR      | 50.73731 | 1.73872  | 60           | 8                        | 2                                | 1                                | 0 (5)                       | 1 (4)                               | 1 (6)                               |
| Chaumont       | FR      | 48.11508 | 5.09475  | 296          | 1                        | 6                                | 2                                | 1 (5)                       | 2 (2)                               | 1 (5)                               |
| Neuchatel      | CH      | 47.00043 | 6.93790  | 556          | 18                       | NA                               | 3                                | 8 (30)                      | NA                                  | 3 (5)                               |
| Cortailod      | CH      | 46.93205 | 6.83290  | 430          | 27                       | NA                               | 2                                | 9 (14)                      | NA                                  | 2 (6)                               |
| Montese        | IT      | 44.25523 | 10.98371 | 707          | 6                        | 6                                | 2                                | 0 (0)                       | 1 (1)                               | 2 (4)                               |
| Rifreddo       | IT      | 40.57235 | 15.82473 | 1172         | 4                        | 0                                | 0                                | 0 (0)                       | 0 (2)                               | 0                                   |
| Visuč          | HRV     | 44.53128 | 15.76134 | 810          | 6                        | 2                                | 0                                | 3 (4)                       | 2 (4)                               | 0 (2)                               |
| Gostilje       | SRB     | 43.65561 | 19.83549 | 785          | 17                       | 3                                | 2                                | 4 (10)                      | 3 (4)                               | 2 (8)                               |
| Sokobanja      | SRB     | 43.60373 | 21.88755 | 844          | 10                       | 2                                | 0                                | 1 (11)                      | 2 (4)                               | 0 (5)                               |
| Chiflik        | BG      | 42.8130  | 24.52836 | 786          | 3                        | 0                                | 0                                | 0 (0)                       | 0 (0)                               | 0 (1)                               |

774 Note: For the insect data, we report the number of inflorescences with both VOC and insect data (i.e. data used in Figure S9); the adjacent bracketed numbers indicate number  
775 of inflorescences with insect data only; this larger sampling was used for all other tests of local adaptation, as well as Figures 2 and 3.

776 **Table S2.** Mean *in-situ* quantities of *Psychoda phalaenoides* and *Psycha grisescens* caught per *Arum*  
 777 *maculatum* inflorescence between 2006 and 2008 (data from Espíndola et al. 2010), and in this study  
 778 between 2017 and 2019.

| Population              | <i>P. phalaenoides</i><br>(Espíndola<br>2010) | <i>P. grisescens</i><br>(Espíndola<br>2010) | <i>P. phalaenoides</i><br>(field surveys<br>2017-2019) | <i>P. grisescens</i><br>(field surveys<br>2017-2019) |
|-------------------------|-----------------------------------------------|---------------------------------------------|--------------------------------------------------------|------------------------------------------------------|
| Fôret du Gavre (FR)     | 0 (5)                                         | 6.4 (5)                                     | 0 (16)                                                 | 25.7 (16)                                            |
| Conteville (FR)         | 47.6 (8)                                      | 2.3 (8)                                     | 0.4 (14)                                               | 1.3 (14)                                             |
| Chaumont (FR)           | 1.6 (6)                                       | 0.5 (6)                                     | 0 (7)                                                  | 0.6 (7)                                              |
| Lausanne/Neuchâtel (CH) | 3.0 (2)                                       | 0 (2)                                       | 2.0 (44)                                               | 0.6 (44)                                             |
| Montese (IT)            | 0 (5)                                         | 2 (5)                                       | NA                                                     | NA                                                   |
| Rifreddo (IT)           | 0 (4)                                         | 2.5 (4)                                     | NA                                                     | NA                                                   |
| Visuc (HRV)             | 0.1 (7)                                       | 0.6 (7)                                     | 1.3 (6)                                                | 3.0 (6)                                              |
| Gostilje (SRB)          | 0 (5)                                         | 2.4 (5)                                     | 0.4 (18)                                               | 0 (18)                                               |
| Sokobanja (SRB)         | 0 (5)                                         | 0.2 (5)                                     | 0 (21)                                                 | 0.1 (21)                                             |
| Chiflik (BUL)           | 0.4 (7)                                       | 4.3 (7)                                     | NA                                                     | NA                                                   |

779 Note: The number of individual inflorescences sampled *in situ* during both sampling periods are  
 780 indicated in parentheses. NAs indicate that no inflorescences were open yet at the time we visited  
 781 populations during our study.

782 **Table S3.** Two-way ANOVA results for pollinators trapped by transplanted *Arum maculatum* growing  
 783 in two common garden sites, dominated by either *Psychoda phalaenoides* or *Psycha grisescens*.

| <b>ALL POLLINATORS</b>           | df | SumSq | MeanSq | F value | Pr(>F) |
|----------------------------------|----|-------|--------|---------|--------|
| common garden loc.               | 1  | 2.34  | 2.3369 | 2.138   | 0.153  |
| native poll.                     | 1  | 0.16  | 0.162  | 0.148   | 0.703  |
| common garden loc : native poll. | 1  | 0.05  | 0.0538 | 0.049   | 0.826  |
| Residuals                        | 34 | 37.16 | 1.0928 |         |        |

| <b>P. PHALAENOIDES</b>            | df | SumSq | MeanSq | F value | Pr(>F)   |
|-----------------------------------|----|-------|--------|---------|----------|
| common garden loc.                | 1  | 18.38 | 18.379 | 16.2    | 0.000301 |
| native poll.                      | 1  | 0.15  | 0.152  | 0.134   | 0.716174 |
| common garden loc. : native poll. | 1  | 0.01  | 0.008  | 0.007   | 0.931867 |
| Residuals                         | 34 | 38.57 | 1.134  |         |          |

\*\*\*

| <b>P. GRISESCENS</b>              | df | SumSq | MeanSq | F value | Pr(>F)   |
|-----------------------------------|----|-------|--------|---------|----------|
| common garden loc.                | 1  | 36.28 | 36.28  | 55.84   | 1.14E-08 |
| native poll.                      | 1  | 0.19  | 0.19   | 0.287   | 0.596    |
| common garden loc. : native poll. | 1  | 0.1   | 0.1    | 0.155   | 0.696    |
| Residuals                         | 34 | 22.09 | 0.65   |         |          |

\*\*\*

784 **Factors:** **Native pollinator** (whether an inflorescence traps *P. phalaenoides* or *P. grisescens* in their  
 785 native population) and **Common Garden Location** (Neuchâtel, a site dominated *P. phalaenoides*, or  
 786 Forêt du Gâvre, a site dominated by *P. grisescens*). F-statistics are shown above (df = 1).

787 \*\*\* P<0.001, \*\* P<0.01, \* P<0.05

788 **Table S4.** The top ten combinations of *Arum maculatum* VOCs with the greatest contribution to the  
789 predictive strength of the random forest model (see Figure S10). Unnamed sesquiterpene (RI 1681)  
790 alone was the strongest predictor of the species composition of pollinators trapped by individual *A.*  
791 *maculatum* inflorescences.

| <b>Compound Blend</b>                                             | <b>Feature Contribution</b> |
|-------------------------------------------------------------------|-----------------------------|
| unnamed sesquiterpene (RI 1681)                                   | 0.1947778                   |
| unnamed sesquiterpene (RI 1473) + unnamed sesquiterpene (RI 1681) | 0.0592275                   |
| $\alpha$ -selinene + unnamed sesquiterpene (RI 1681)              | 0.0502504                   |
| $\beta$ -humulene                                                 | 0.0436112                   |
| $\beta$ -citronellene                                             | 0.0361404                   |
| $\alpha$ -selinene                                                | 0.0320748                   |
| $\beta$ -humulene + unnamed sesquiterpene (RI 1681)               | 0.0180302                   |
| $\beta$ -citronellene + indole                                    | 0.0138245                   |
| unnamed sesquiterpene (RI 1404) + unnamed sesquiterpene (RI 1681) | 0.0119733                   |
| unnamed sesquiterpene (RI 1404)                                   | 0.0114971                   |

792

793 **Table S5.** Mann Whitney U (Wilcoxon rank-sum) test results, comparing the emissions of four VOCs  
794 associated with species-specific Psychodidae attraction. To test for shifts in VOCs related to  
795 environmental variation, comparisons were made between samples collected in the Forêt du Gâvre  
796 common garden and in the Neuchâtel common garden.

| Pop. | $\alpha$ -selinene<br>( <i>p</i> ) | <i>Z</i> | $\beta$ -humulene<br>( <i>p</i> ) | <i>Z</i> | Sesquiterpene<br>RI 1473 ( <i>p</i> ) | <i>Z</i>      | Sesquiterpene<br>RI 1681 ( <i>p</i> ) | <i>Z</i> |
|------|------------------------------------|----------|-----------------------------------|----------|---------------------------------------|---------------|---------------------------------------|----------|
| GAV  | 0.0105                             | 2.5584   | 0.0213                            | -2.3026  | 0.3706                                | -0.8954       | 0.1111                                | 1.8557   |
| NEU  | 0.0102                             | 2.5700   | 0.7428                            | -0.3281  | <b>0.0004 *</b>                       | <b>3.5475</b> | 0.3128                                | 1.0094   |
| CHA  | 0.2857                             | 1.4652   | 0.8591                            | -0.1776  | 0.5942                                | 0.5327        | 0.8571                                | 0.4637   |
| MON  | 1.0000                             | 0.0000   | 0.8591                            | 0.1776   | 1.0000                                | 0.0000        | 0.1798                                | 1.3413   |

797 \* Significant after Bonferroni correction for multiple testing

## 798 **APPENDIX S2 – SUPPLEMENTARY METHODS**

### 799 Floral odor collection and identification

800 *A. maculatum* inflorescences open for a duration of roughly 24h, with VOC emissions peaking  
801 in the late afternoon / early evening of the first flowering day. We therefore carried out all  
802 floral odor sampling between 18:00 at the earliest and 20:30 at the latest. We sampled dynamic  
803 headspace volatile organic compounds (VOCs) using polydimethylsiloxane (PDMS) coated  
804 Gerstel Twister® (Mülheim an der Ruhr, Germany) stir bar sorptive extraction. Inflorescences  
805 were wrapped in inert oven bags (Tangan No34 distributed by Migros, Zurich, Switzerland)  
806 cut open at least 8cm above the tip of the spathe to prevent condensation, due to the strong  
807 thermogenesis of the appendix. Twisters® were inserted in a glass tube through the oven bag  
808 at a height even with, but not contacting, the tip of the spadix. 6L of air was pumped over  
809 Twisters® at a standard rate of 200mL per minute for 30 minutes – except for five samples  
810 from Conteville, France, where sampling was carried out at the same rate over only 15 minutes.  
811 At every sampling site, at least one empty oven bag was placed approximately 5 meters away  
812 from any inflorescences, and ambient air was passed over Twisters® identically as with *A.*  
813 *maculatum* inflorescences; these samples were used as controls to filter out ambient air VOCs.  
814 All samples were transported in glass vials on ice, and stored at -21°C until analysis.

815

### 816 *Gas Chromatography*

817 We applied 1µL of internal standard (5µg mg/mL naphthalene in dichloromethane) directly to  
818 each Twister® immediately before processing. Using a Multipurpose Sampler (Gerstel,  
819 Mülheim an der Ruhr, Germany), VOCs were thermally desorbed and separated on a HP-5MS  
820 column, 30 m x 0.25mm x 0.25µm at 40°C for 30 sec, increasing temperature by 5°C per min  
821 to 160°C, which was held for 0.01 min before increasing 3°C per min to reach 200°C, which  
822 was held for 4 min, finally increasing at 10°C per min. until reaching 250°C for 3 min.

823 *Volatile Data Processing*

824 We aligned peaks by retention time within each population. Major ions were recorded for each  
825 integrated peak using Agilent Chemstation software. Putative compound identifications were  
826 then derived from NIST 2.3 (library version 17) hits confirmed for the same peak in several  
827 spectra; all names used in the final analysis should be considered hypotheses. Compounds  
828 present in blank samples with a mean quantity anywhere near those within *A. maculatum*  
829 samples were removed prior to further analyses. Quantitative values were obtained by dividing  
830 compound peak areas by the internal standard, then multiplying by the internal standard  
831 concentration, and finally scaling based on sampling time (for the few samples run for less than  
832 30 minutes).

833

834 Pollinator identification

835 On the morning after floral odor collection, all trapped pollinators were collected from within  
836 each inflorescence and preserved in 70% ethanol. All pollinators were identified to at least the  
837 suborder level. Psychodidae were further identified to species level using taxonomic  
838 information and illustrations (Ježek 1990). First, the number of antennal segments were  
839 counted. 15 segments indicated specimens were likely *P. phalaenoides* or *P. crassipennis*. 16  
840 segments indicated either *P. griseescens* or *P. trinodulosa* - wing venation patterns were then  
841 examined for 16-segmented specimens, as *P. trinodulosa* has a characteristic disconnection in  
842 one branched vein. To confirm the final species identity (particularly when intact antennae  
843 were not available) and sex of all psychodids, the reproductive anatomy of specimens were  
844 also examined: Psychodid abdomens were separated, flattened, cleared in a diluted solution of  
845 potash, and mounted on a slide in glycerol beside their decapitated head, and wings laid out  
846 flat.

847

## 848 Clustering VOCs using Unsupervised Learning Algorithms

849 The optimal clustering algorithm (k-means, PAM, or hierarchical clustering) and number of  
850 clusters (k = 1 through k = 10) was selected using the clustering validation function  
851 implemented in the R package *clValid* (Brock et al. 2008). Following this step, k-medoids  
852 (PAM) clustering (Kaufman and Rousseeuw 1990) was used to cluster samples into the optimal  
853 number of groups (validated with ‘Silhouette’ and ‘Elbow’ plots); a cluster plot was then  
854 created using the R package *factoextra* (Kassambara and Mundt 2019).

855

856 We identified significant differences in VOC blend composition among the identified clusters  
857 using a Kruskal-Wallis test, and then plotted the mean VOC blend of each cluster. Next, we  
858 produced population-level Bray-Curtis similarity matrices, to investigate whether 1) within-  
859 cluster similarity was greater than within-population similarity and 2) between-cluster  
860 similarity was less than between-population similarity; the variation within each group in the  
861 resulting matrices was then visualized using boxplots.

862

## 863 **REFERENCES**

- 864 Brock, G., Pihur, V., Datta, S. & Datta, S. (2008). *clValid*: An R Package for Cluster  
865 Validation. *Journal of Statistical Software*, 25(4), 1-22. <http://www.jstatsoft.org/v25/i04/>
- 866 Kassambara, A. & Mundt, F. (2019). *factoextra*: Extract and Visualize the Results of  
867 Multivariate Data Analyses v. 1.0.6 <https://CRAN.R-project.org/package=factoextra>
- 868 Kaufman, L. & Rousseeuw, P.J. (1990). Partitioning around Medoids (Program PAM). In:  
869 Kaufman, L. and Rousseeuw, P.J., Eds., *Finding Groups in Data: An Introduction to*  
870 *Cluster Analysis*. John Wiley & Sons, Hoboken. pp. 68-125.
- 871 Ježek, J. (1990). Redescriptions of Nine Common Palaeartic And Holarctic Species of  
872 *Psychodini*. *Acta Entomologica Musei Nationalis Pragae*, 43, 33-83.
